# Inflammatory Cytokines and Survival Factors from Serum Modulate Tweak-Induced Apoptosis in PC-3 Prostate Cancer Cells

Ana Belen Sanz<sup>1</sup>, Maria Dolores Sanchez-Niño<sup>1</sup>, Susana Carrasco<sup>2</sup>, Felix Manzarbeitia<sup>3</sup>, Olga Ruiz-Andres<sup>2</sup>, Rafael Selgas<sup>1</sup>, Marta Ruiz-Ortega<sup>2</sup>, Carmen Gonzalez-Enguita<sup>4</sup>, Jesus Egido<sup>2</sup>, Alberto Ortiz<sup>2\*</sup>

**1** Nefrologia, IdiPAZ, Madrid, Spain, **2** Nefrologia, IIS-Fundación Jiménez Díaz, Universidad Autónoma de Madrid and Fundación Renal Iñigo Alvarez de Toledo, Madrid, Spain, **3** Anatomía Patológica, IIS-Fundación Jiménez Díaz, Universidad Autónoma de Madrid, Madrid, Spain, **4** Urología, IIS-Fundación Jiménez Díaz, Universidad Autónoma de Madrid, Madrid, Spain

## Abstract

Tumor necrosis factor-like weak inducer of apoptosis (TWEAK, TNFSF12) is a member of the tumor necrosis factor superfamily. TWEAK activates the Fn14 receptor, and may regulate cell death, survival and proliferation in tumor cells. However, there is little information on the function and regulation of this system in prostate cancer. Fn14 expression and TWEAK actions were studied in two human prostate cancer cell lines, the androgen-independent PC-3 cell line and androgen-sensitive LNCaP cells. Additionally, the expression of Fn14 was analyzed in human biopsies of prostate cancer. Fn14 expression is increased in histological sections of human prostate adenocarcinoma. Both prostate cancer cell lines express constitutively Fn14, but, the androgen-independent cell line PC-3 showed higher levels of Fn14 than the LNCaP cells. Fn14 expression was up-regulated in PC-3 human prostate cancer cells in presence of inflammatory cytokines (TNF $\alpha$ /IFN $\gamma$ ) as well as in presence of bovine fetal serum. TWEAK induced apoptotic cell death in PC-3 cells, but not in LNCaP cells. Moreover, in PC-3 cells, co-stimulation with TNF $\alpha$ /IFN $\gamma$ /TWEAK induced a higher rate of apoptosis. However, TWEAK or TWEAK/TNF $\alpha$ /IFN $\gamma$  did not induce apoptosis in presence of bovine fetal serum. TWEAK induced cell death through activation of the Fn14 receptor. Apoptosis was associated with activation of caspase-3, release of mitochondrial cytochrome C and an increased Bax/Bcl $\times$ L ratio. TWEAK/Fn14 pathway activation promotes apoptosis in androgen-independent PC-3 cells under certain culture conditions. Further characterization of the therapeutic target potential of TWEAK/Fn14 for human prostate cancer is warranted.

**Citation:** Sanz AB, Sanchez-Niño MD, Carrasco S, Manzarbeitia F, Ruiz-Andres O, et al. (2012) Inflammatory Cytokines and Survival Factors from Serum Modulate Tweak-Induced Apoptosis in PC-3 Prostate Cancer Cells. PLoS ONE 7(10): e47440. doi:10.1371/journal.pone.0047440

**Editor:** Daniel Sanchis, Universitat de Lleida - IRBLLEIDA, Spain

**Received:** June 20, 2012; **Accepted:** September 17, 2012; **Published:** October 15, 2012

**Copyright:** © 2012 Sanz et al. This is an open-access article distributed under the terms of the Creative Commons Attribution License, which permits unrestricted use, distribution, and reproduction in any medium, provided the original author and source are credited.

**Funding:** Grant support from Fondo de Investigación Sanitaria (FIS) PS09/00447, Instituto de Salud Carlos III-Redes Temáticas de Investigación Cooperativa en Salud (ISCIII-RETIC)REDinREN/RD06/0016. The funders had no role in study design, data collection and analysis, decision to publish, or preparation of the manuscript.

**Competing Interests:** The authors have declared that no competing interests exist.

\* E-mail: aortiz@fjd.es

## Introduction

Prostate cancer is the second leading cause of cancer-related death in males [1]. Most cases of prostate cancer present as localized disease and may be cured with surgery and radiation. However, as is true with most solid malignancies, the development of metastatic disease is ultimately lethal. Despite active systemic therapies, the metastatic phenotype will drive in the development of resistance and disease progression. Moreover, systemic treatments in prostate cancer are limited. Until recently, there were only three FDA-approved chemotherapeutic agents for use in castrate-resistant prostate cancer (estramustine, mitoxantrone, and docetaxel) and two additional agents were approved in 2010 (sipuleucel-T and cabazitaxel [2]). However, there is still a clear need to develop additional systemic therapies. The growth of normal prostate epithelial cells is under the tight control of various growth factors, most notably androgens, castration leads to apoptosis of this cell population. Androgen-depletion has a similar effect on prostate cancers. However, following initial regression tumors often return in an androgen-depletion independent form

that is frequently lethal. Thus, it is of particular interest to search for agents able to kill androgen-independent prostate cancer cells.

Tumor necrosis factor (TNF) was originally described as a factor toxic for tumors [3,4]. It was later shown to belong to the TNF superfamily (TNFSF) of cytokines [5,6]. Many TNFSF cytokines regulate cell death and proliferation, as well as inflammation and may have a role in tumor biology, including prostate cancer biology [7–9]. As an example, recent attention has focused on the anti-tumor activity of TNF-related apoptosis-inducing ligand (TRAIL) [10,11]. However, in vivo prostate cancers express osteoprotegerin, a decoy receptor for both TRAIL and activator of nuclear factor- $\kappa$ B ligand (RANKL) [12]. TNFSF cytokines activate a family of receptors (TNFRSF) many of which carry a death domain (DD) and function as death receptors. Activation of death receptors in tumor cells by cytotoxic immune cells is the main mechanism by which the immune system eliminates malignant cells [13].

Tumor necrosis factor-like weak inducer of apoptosis (TWEAK, Apo3L, TNFSF12) is one of the most recent members of TNFSF

to be identified [14,15]. TWEAK was originally described as an inducer of apoptosis in tumor cells. In addition, TWEAK can regulate cell proliferation, cell death, cell migration, cell differentiation, tissue regeneration, neoangiogenesis and inflammation [16–24]. TWEAK activates a single receptor, fibroblast growth factor-inducible-14 (Fn14, TWEAK receptor, TNFRSF12A, CD266). TWEAK activation of the Fn14 receptor results in apoptotic cell death of multiple tumor cell lines [22,25–29]. Indeed, a phase I clinical trial of a humanized anti-TWEAK receptor monoclonal antibody in subjects with advanced solid tumors was recently completed [30]. However, TWEAK-Fn14 up-regulates VEGF expression to foster ovarian cancer cell metastasis [31] and promotes breast cancer cell invasive capacity [32]. There is evidence that the different, even opposed, actions of TWEAK could be determined by the microenvironment. In this regard, TWEAK induces apoptosis in renal tubular cells in a pro-inflammatory environment, while, it promotes proliferation in presence of bovine fetal serum [33,34]. Prostate cancer cells have been shown to express Fn14 and high expression of Fn14 was significantly associated with higher prostate-specific antigen recurrence rate in patients who underwent radical prostatectomy [35]. Fn14 was highly expressed in androgen-independent prostate cancer cell lines, DU145 and PC-3, whereas expression was weak in androgen-sensitive LNCaP cells. A role for Fn14 in migration, invasion and proliferation was described in PC-3 cells [35].

We now explore the manipulation of the cell culture conditions as a potential tool to turn the TWEAK/Fn14 system against the tumor. We report that the inflammatory cytokines and survival factor from serum modulate the response of PC-3 cells to TWEAK. In the absence of serum TWEAK/Fn14 pathway activation promotes apoptosis in androgen-independent PC-3 cells, but not in androgen-sensitive LNCaP cells. A better understanding of this regulation may turn a potential advantage of tumor cells into a therapeutic opportunity.

## Methods

### Cells and Reagents

Two human prostate cancer cell lines were used: the androgen-independent PC-3 cell line and androgen-sensitive LNCaP cells (ATCC, Rockville, MD; CRL 1435 and 1740, respectively) [36,37]. Cells were grown in RPMI 1640 with 10% fetal bovine serum (FBS), 2 mM glutamine, and antibiotics (100 U/ml of penicillin and 100 µg/ml of streptomycin), in 5% CO<sub>2</sub> at 37°C. RPMI-1640, penicillin, streptomycin, and trypsin-EDTA were from BioWhittaker (Waltham, MA) and FBS from Gibco (Carlsbad, CA). For experiments, cells were serum-depleted for 24 hours, and then treated with different stimuli. As positive control of Fn14 expression human proximal tubular epithelial (HK-2) cells (ATCC, CRL 2190) were used [38].

Recombinant human TWEAK (Millipore, Billerica, MA), unless otherwise specified, was used at 100 ng/mL. ITEM-2 neutralizing anti-Fn14 antibody (eBioscience, San Diego, CA), neutralizing anti-TWEAK antibody (BioLegend, San Diego, CA) and neutralizing anti-TNF antibody (BioLegend) were added 1 hour prior to stimuli. Human TNFα (PrePotech, London, UK) at 30 ng/mL, and human interferon-γ (IFNγ) (PrePotech) at 30 U/ml, were used in some experiments. All these concentrations are based on prior dose-response studies performed in our lab [33,34]. Benzoyloxycarbonyl-Val-Ala-DL-Asp-fluoromethylketone (zVAD-fmk) (Calbiochem, San Diego, CA, USA) was dissolved in DMSO and added 1 hour prior to stimuli. Final concentration of DMSO in culture did not modulate cell death. Bax inhibitor peptide, P5,

was dissolved in water and was added 1 hour prior to stimuli (Tocris, Bristol, UK) [38].

### Cell Surface Fn14 Expression

Cells were plated at a density of  $8 \times 10^4$  cells in twelve-well plates. Following stimulation they were detached with 2 mM EDTA/1% BSA in PBS, washed, and resuspended in PBS/1% BSA and blocked for 4 min. Then cells were incubated with 1 µg/ml anti-Fn14 ITEM4 antibody (eBioscience, San Diego, CA) or an isotype-matched control antibody for 30 min on ice. Cells were washed twice, blocked for 4 min and incubated with Alexa488-labeled goat anti-mouse IgG antibody (1/300, Invitrogen, Carlsbad, CA) for 45 min on ice in the dark. Following two additional washes with PBS/1% BSA, cells were resuspended in 1% filtered paraformaldehyde in PBS and analyzed by flow cytometry using BD CellQuest Software (BD Biosciences, San Jose, CA) [39].

### RNA Extraction and Real-Time Polymerase Chain Reaction

Total RNA was extracted from cells by the TRI Reagent method (Sigma) and 1 µg of RNA was reverse transcribed with High Capacity cDNA Archive Kit (Applied Biosystems, Foster City, CA). Pre-developed primer and probe assays for Fn14, and GAPDH (human) were from Applied (Applied Biosystems). Quantitative PCR was performed by 7500 Real Time PCR System with the Prism 7000 System SDS Software (Applied Biosystems) and RNA expression of different genes was corrected for GAPDH [40].

### Western Blot

Cell samples were homogenized in lysis buffer (50 mM TrisHCl, 150 mM NaCl, 2 mM EDTA, 2 mM EGTA, 0.2% Triton X-100, 0.3% NP-40, 0.1 mM PMSF and 1 µg/ml pepstatin A) then separated by 12% SDS-PAGE under reducing conditions. After electrophoresis, samples were transferred to PVDF membranes (Millipore), blocked with 5% skimmed milk in PBS/0.5% v/v Tween 20 for 1 hour, washed with PBS/Tween, and incubated with rabbit polyclonal anti-Fn14 (1:1000, Cell Signaling, Danvers, MA), mouse monoclonal anti-BclxL (1:500, Santa Cruz Biotechnology, Santa Cruz, CA), rabbit polyclonal anti-Bax (1:500, Santa Cruz Biotechnology), or rabbit polyclonal anti-cleaved active caspase 3 (1:500, Cell Signaling). Anti-Fn14 was diluted in 5% BSA and the others antibodies were diluted in 5% milk PBS/Tween. Blots were washed with PBS/Tween and incubated with appropriate horseradish peroxidase-conjugated secondary antibody (1:2000, Amersham, Aylesbury, UK). After washing with PBS/Tween blots were developed with the chemiluminescence method (ECL) (Amersham). Blots were then probed with mouse monoclonal anti-α-tubulin antibody (1:2000, Sigma) and levels of expression were corrected for minor differences in loading [41].

### Apoptosis and Cell Death

10,000 cells were seeded in 12-well plates (Costar, Cambridge, MA) in 10% FCS RPMI overnight. In some cases they were rested in serum-free medium for 24 hour. Thereafter, stimuli were added to subconfluent cells. Apoptosis was characterized by morphologic and functional criteria. Nuclei of formalin-fixed cells were stained with DAPI (Sigma) to observe the typical morphological changes, as previously described [33,42]. For assessment of apoptosis by flow cytometry adherent cells were pooled with spontaneously detached cells, and incubated in 100 µg/mL propidium iodide

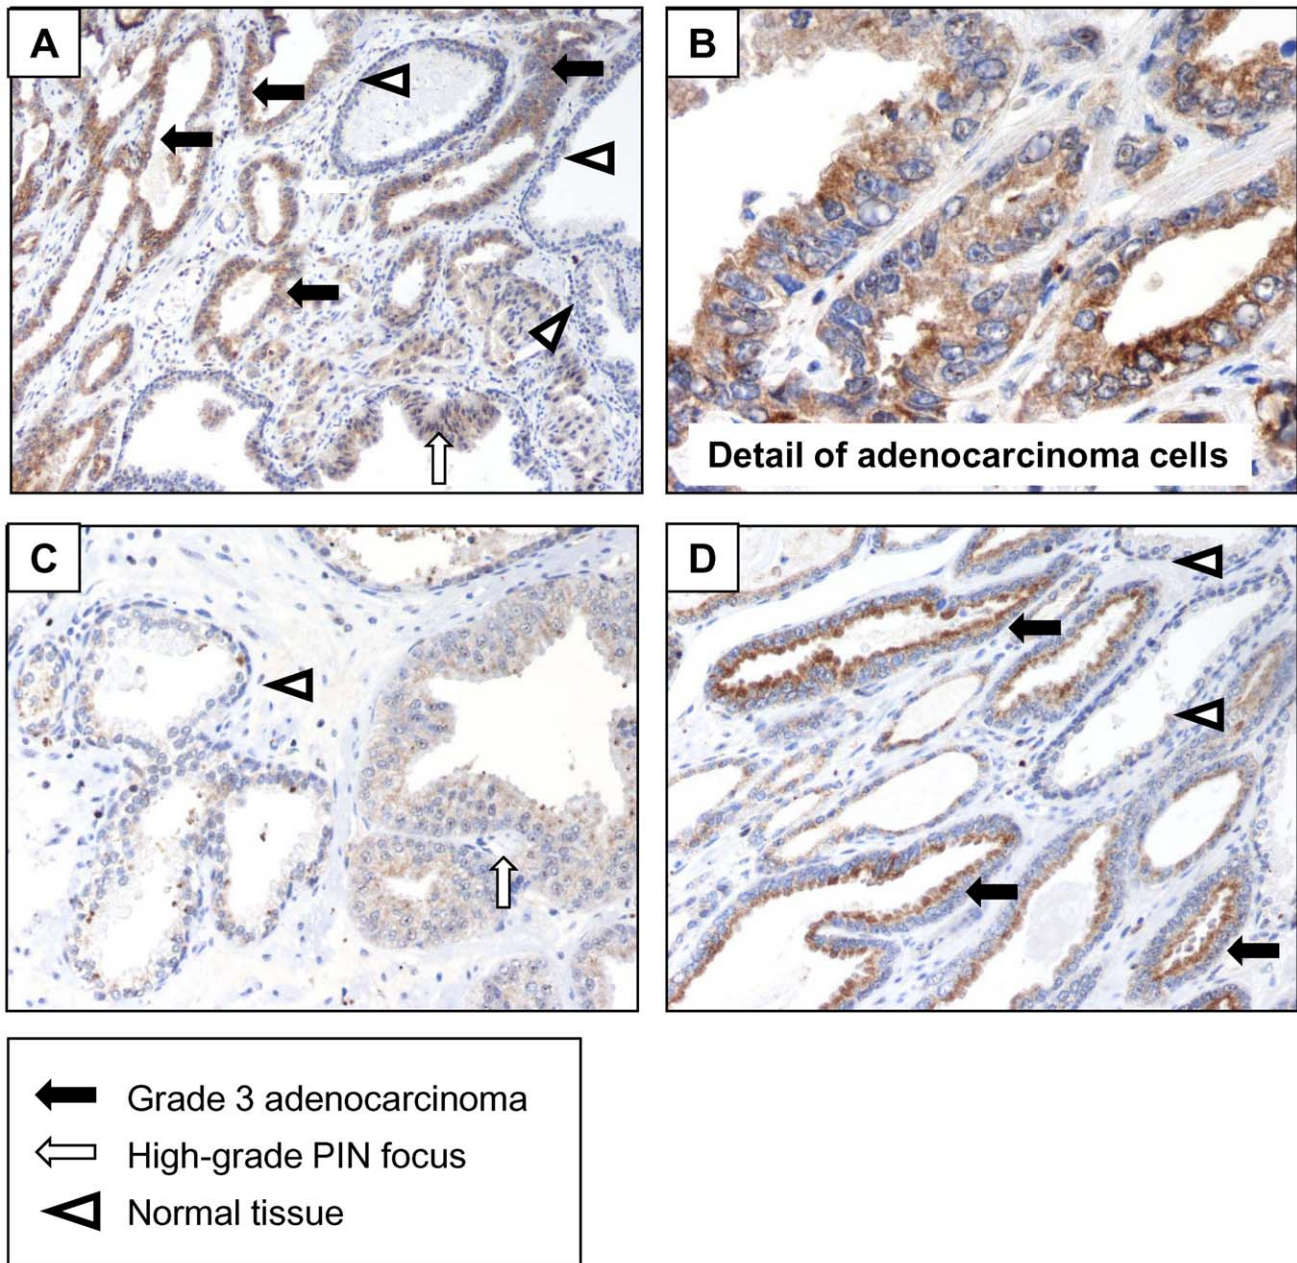

**Figure 1. Fn14 expression in human prostate carcinoma.** **A)** Prostate adenocarcinoma Gleason score 7 (3+4). Original magnification  $\times 200$ . Fn14 staining is very positive in grade 3 adenocarcinoma (black arrows) and mildly positive in a high-grade PIN focus (white arrow). No or little staining is observed in normal gland (arrowheads). **B)** Detail of adenocarcinoma cells from the same biopsy. Original magnification  $\times 400$ . **C)** Prostate adenocarcinoma Gleason score 6 (3+3). Mild Fn14 staining in high-grade grade PIN focus (white arrow), while normal tissue is negative (arrowhead). Original magnification  $\times 200$ . **D)** Fn14 staining is very positive in grade 3 adenocarcinoma (black arrows), while normal tissue is negative (arrowheads). Original magnification  $\times 200$ .  
doi:10.1371/journal.pone.0047440.g001

(PI), 0.05% NP-40, 10  $\mu\text{g}/\text{mL}$  RNase A in PBS at  $4^\circ\text{C}$  for  $>1$  h. This assay permeabilizes the cells, thus PI stains both live and dead cells. The percentage of apoptotic cells with decreased DNA staining (hypodiploid cells) was counted by flow cytometry using BD CellQuest Software (BD Biosciences) [33,34,42].

To quantify cell death, cells were resuspended in 100  $\mu\text{l}$  of PBS and stained with 100  $\mu\text{g}/\text{mL}$  PI just before to flow cytometry. This assay is based on the known ability of PI to enter in dead cells. The percentage of dead cells (stained with PI) and live cells (not stained

cells) was counted by flow cytometry using BD FACS Diva Software (BD Biosciences).

#### Assessment of Apoptosis by Annexin V-FITC

Briefly,  $5 \times 10^5$  cells were washed with ice-cold PBS, resuspended in 100  $\mu\text{l}$  binding buffer, and, stained with 2.5  $\mu\text{l}$  of FITC-Annexin V (Myltenyi Biotec, Bergisch Gladbach, Germany). The cells were incubated for 15 min at  $37^\circ\text{C}$  in the dark. Then, 200  $\mu\text{l}$  of binding buffer containing PI (20  $\mu\text{g}/\text{mL}$ ) was added just before flow cytometry. The cells were analyzed using FACS Canto

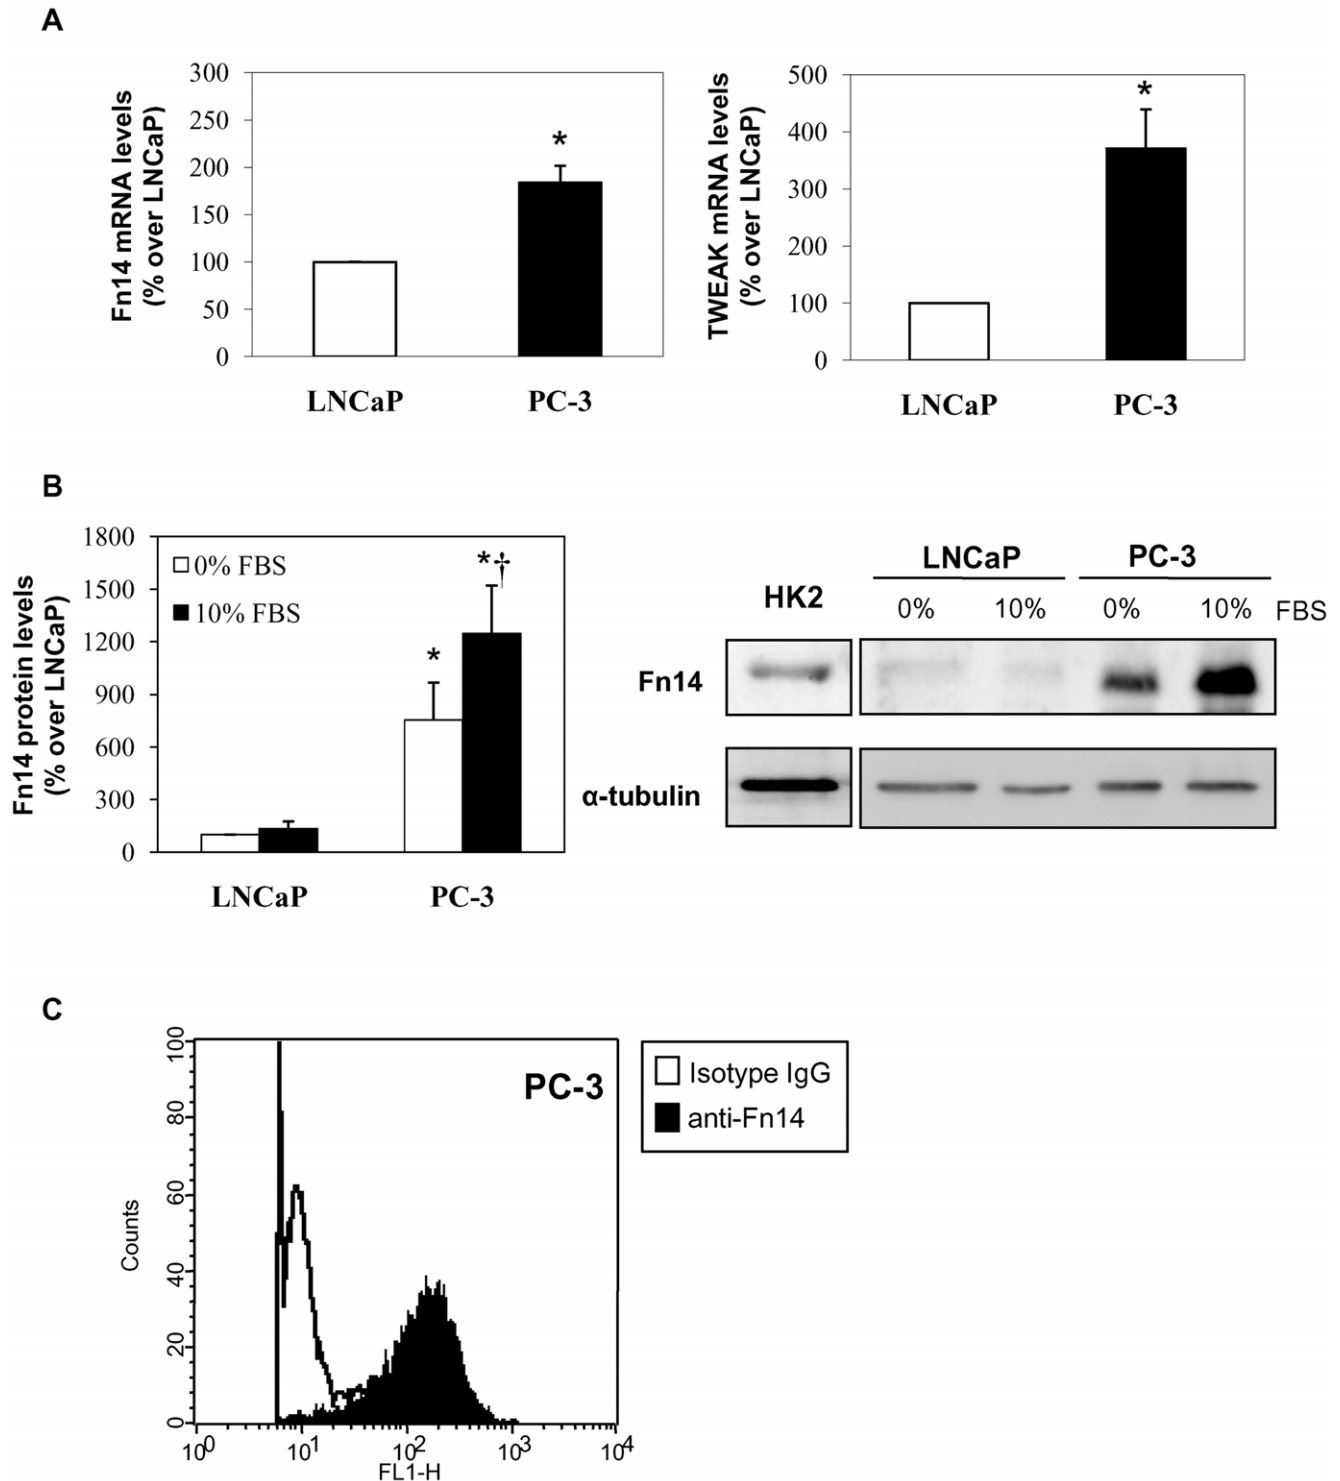

**Figure 2. Fn14 expression in human prostate cancer PC-3 and LNCaP cell lines.** **A)** Analysis of Fn14 and TWEAK mRNA expression by quantitative RT-PCR. Mean ( $\pm$ SEM) of three independent experiments; \* $p < 0.05$  vs LNCaP cells. **B)** Analysis of Fn14 protein expression by western blot in human prostate cancer cells cultured with or without 10% FBS for 24 hours. Mean ( $\pm$ SEM) of three independent experiments. \* $p < 0.02$  vs LNCaP cells. † $p < 0.05$  vs 0% FBS PC-3 cells. HK2 cells are shown as positive control. **C)** Analysis of cell surface expression of Fn14 by flow cytometry. Representative experiment. Cells were stained with an isotype-matched antibody (white area) or anti-Fn14 antibody (black area). doi:10.1371/journal.pone.0047440.g002

cytometer and FACS Diva Software (BD Biosciences). Early and late apoptosis was evaluated on PE fluorescence (PE for PI) versus FITC fluorescence (FITC for Annexin) plots. Cells stained with

only Annexin V were evaluated as being in early apoptosis; cells stained with both Annexin V and PI were evaluated as being in late apoptosis stage.



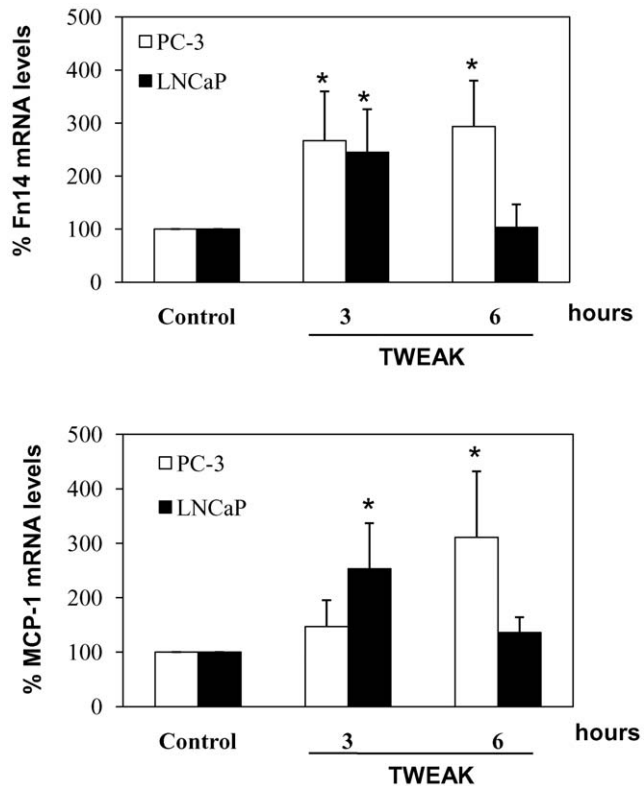

**Figure 3. PC-3 and LNCaP cells respond to TWEAK treatment.** PC3 and LNCaP cells were stimulated with 100 ng/mL TWEAK for the indicated points, and Fn14 and MCP-1 mRNA levels were measured by RT-PCR. Both cell lines respond to TWEAK, but, the PC-3 response is more sustained compared to LNCaP cells. Mean ( $\pm$ SEM) of three independent experiments.\* $p < 0.05$  vs control. doi:10.1371/journal.pone.0047440.g003

### Immunostaining

Cells plated onto Labtek<sup>TM</sup> slides were fixed in 4% paraformaldehyde and permeabilized in 0.2% Triton X-100/PBS, washed in PBS and incubated with rabbit polyclonal anti-active caspase 3 (1:100, Cell Signaling) or anti-cytochrome C (1:500, BDPharmigen) followed by Alexa-488 or Alexa-633 conjugated secondary antibody respectively (1:300, Invitrogen). Nuclei were counterstained with propidium iodide or DAPI respectively.

### Immunohistochemistry

Fn14 immunohistochemistry was performed in 5 biopsies from patients diagnosed of prostate adenocarcinoma, aged 65 to 77 years. The Ethics Committee of Fundacion Jimenez Diaz approved the study, and informed consent was obtained from each subject. The antigenic epitope retrieval was performed in 3  $\mu$ m thick sections of paraffin-embedded tissue using a PTlink device (with a high pH solution, 95°C, 20 min). The tissue slides were incubated for 30 min at room temperature with the primary antibody, rabbit polyclonal anti-Fn14 (1:100, Cell Signaling). For immunohistochemical staining EnvisionFLEX + visualization system was used, in a DAKO Autostainerplus platform. The tissue sections were subsequently counterstained with hematoxylin. Same sections were incubated without the primary antibody as negative controls.

### Statistics

Statistical analysis was performed using SPSS 11.0 statistical software. Results are expressed as mean  $\pm$  SEM for protein and mRNA expression experiments and as mean  $\pm$  SD for flow cytometry experiments. Significance at the  $p < 0.05$  level was assessed by Student's t test for two groups of data and ANOVA for three or more groups.

### Results

#### Expression of Fn14 in Prostate Cancer

Prostate adenocarcinoma biopsies displayed a similar pattern of Fn14 expression (**Figure 1**). Fn14 expression was negative in normal prostate epithelium, mildly positive in high-grade prostatic intraepithelial neoplasia (PIN) foci and very positive in prostate adenocarcinoma. This suggests that the cell culture observation that prostate carcinoma cell lines express Fn14 is clinically relevant and is concordant with prior reports [35].

#### Constitutive Fn14 and TWEAK Expression in Human Prostate Cancer Cells

First, we studied the expression of TWEAK and Fn14, the TWEAK receptor, in two different human prostate cancer cell lines, PC-3 and LNCaP. PC-3 is an androgen-independent cell line, whereas LNCaP is an androgen-sensitive cell line. Both cell lines constitutively expressed Fn14 at the mRNA (**Figure 2.A**) and protein levels (**Figure 2.B**). Although, basal Fn14 expression, either mRNA levels or protein levels, was significantly higher in PC-3 cells compared to LNCaP cells. Moreover, basal levels of TWEAK also were higher in PC-3 cells compared to LNCaP cells, as assessed by RT-PCR (**Figure 2.A**).

Fn14 expression was clearly increased by fetal bovine serum (FBS) in PC3 cells, and, weakly in LNCaP cells (**Figure 2.B**). These results are similar to those reported by Huang et al [35], and, suggest that Fn14 may have a role in prostate cancer because is highly expressed in the more aggressive malignant cells. Finally, we demonstrated by flow cytometry that PC-3 cells expressed Fn14 in cell surface (**Figure 2.C**).

#### TWEAK Increased Fn14 and MCP-1 Expression in Prostate Cancer Cells

TWEAK is a multifunctional cytokine that can induce inflammatory molecule production in numerous cell types [40]. We stimulated prostate cancer cells with TWEAK and measured Fn14 and MCP-1 mRNA levels by RT-PCR. We observed that TWEAK increased Fn14 and MCP-1 expression in both cell lines, demonstrating that, the two cell types have functional TWEAK receptor (**Figure 3**). However, the time course differed between the two cell lines, being more transient in LNCaP cells than in PC-3 cells.

#### Regulation of Fn14 Expression in PC-3 Cells

In various cell types Fn14 expression is dependent on the microenvironment [33,34,43,44]. FBS, which is rich in growth and survival factors, increased Fn14 expression in PC-3 cells at the mRNA, as assessed by RT-PCR (**Figure 4.A**) and protein levels, as measured by western blot (**Figure 4.B, E**).

The inflammatory cytokines TNF $\alpha$  and IFN $\gamma$  also upregulated Fn14 mRNA (**Figure 4.C**) and protein (**Figure 4.D, E**) expression in PC-3 cells. The time course of Fn14 upregulation in response to TNF $\alpha$ /IFN $\gamma$  was delayed with respect to observations in other cell types [33].

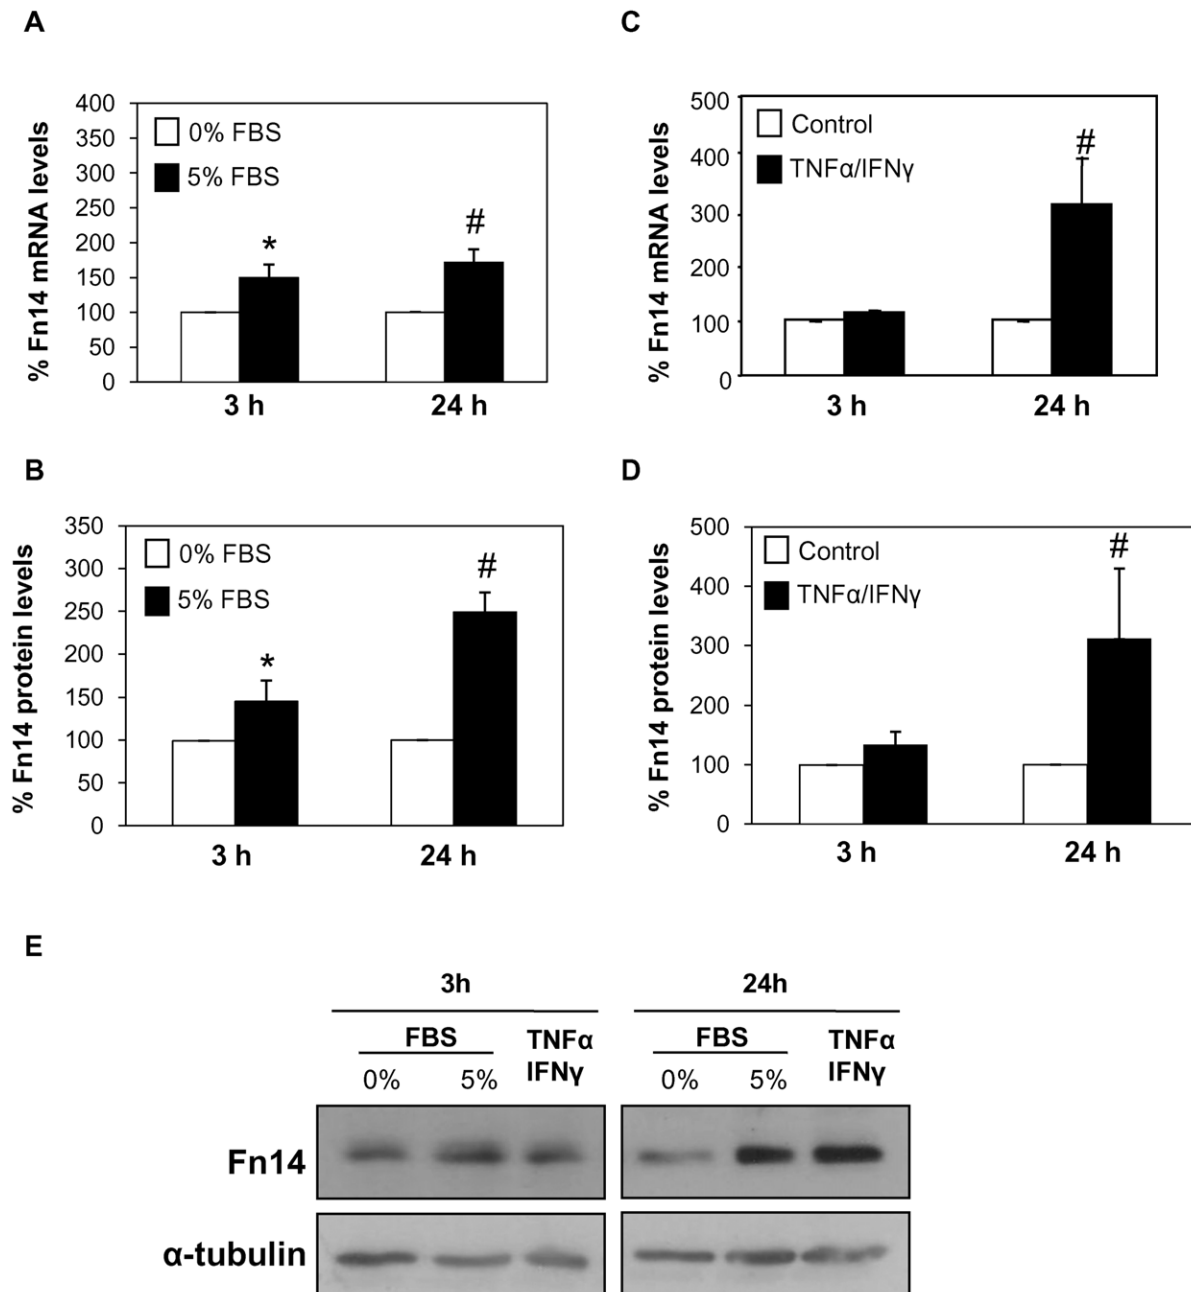

**Figure 4. Fn14 expression in PC-3 cells is dependent on the microenvironment.** **A, B)** PC-3 prostate cancer cells were cultured with 0% or 5% FBS for 3 or 24 hours. Fn14 mRNA expression was measured by quantitative RT-PCR (**A**) and Fn14 protein expression was studied by Western blot (**B**). Mean ( $\pm$ SEM) of four independent experiments. \* $p < 0.03$  versus 0% FBS 3h; # $p < 0.003$  vs 0% FBS 24 hours. **C, D)** Analysis of Fn14 mRNA expression (**C**), and Fn14 protein expression (**D**) in PC-3 cells treated with TNF $\alpha$  (30 ng/mL)/IFN $\gamma$  (30 u/mL) for 3 or 24 hours. Mean ( $\pm$ SEM) of four independent experiments. # $p < 0.03$  vs control 24 hours. **E)** Representative Western blot of Fn14 in PC-3 cells cultured with 0%FBS, 5%FBS or TNF $\alpha$ /IFN $\gamma$  for 3 and 24 hours.

doi:10.1371/journal.pone.0047440.g004

#### Lethal Effect of TWEAK in Human Prostate Cancer Cells

TWEAK can induce apoptosis, survival or even proliferation in different tumor cell lines and other cells [27,33,34]. We studied the lethal effect of TWEAK over prostate cancer cell lines. TWEAK (100 ng/mL) induced apoptosis in PC-3 cultured in the absence of FBS. The lethal effect was prevented by FBS (**Figure 5.A**). In some cases, TWEAK-induced cell death requires co-incubation with sensitizers, such as the inflammatory cytokines TNF $\alpha$  and IFN $\gamma$  [19,33]. In this regard, co-incubation

of TWEAK with TNF $\alpha$ /IFN $\gamma$  strongly increased apoptosis in PC-3 cells (**Figure 5.A**). Neither TNF $\alpha$  nor IFN $\gamma$ , alone or together, induced apoptosis in PC-3 cells (data not shown). However, TWEAK did not induce apoptosis in serum depleted LNCaP cells, neither alone, nor in combination with TNF $\alpha$ /IFN $\gamma$  (**Figure 5.B**). These results are concordant with the effect of TWEAK observed in renal tubular cells, where, TWEAK induces proliferation in non-stressed cells, but, induces apoptosis in the presence of inflammatory cytokines [33,34]. TWEAK-

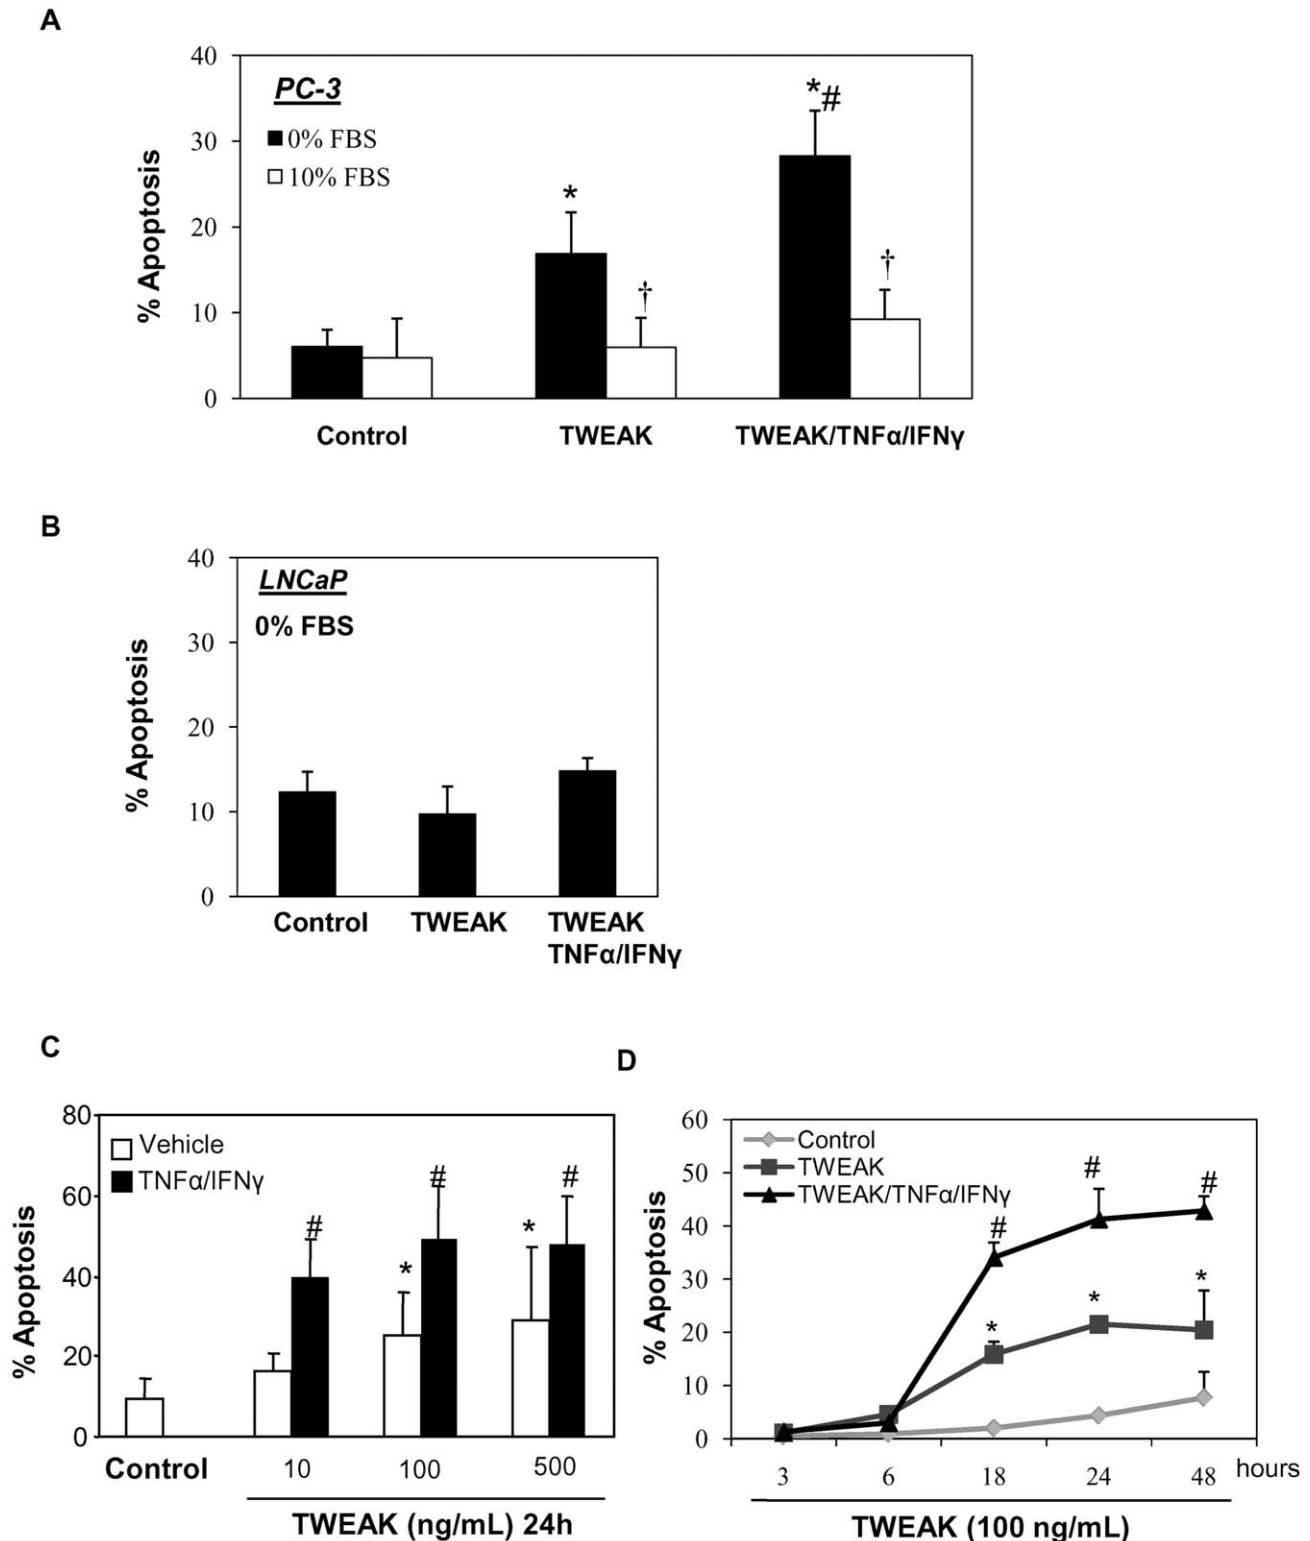

**Figure 5. TWEAK induces apoptosis in serum depleted androgen-independent PC-3 cells but not in androgen-sensitive LNCaP cells.** Cell death was assessed by flow cytometry of DNA content. Hypodiploid cells were considered apoptotic. A) PC-3 cells, cultured with or without 10% FBS, were stimulated with TWEAK (100 ng/mL) alone or in presence of TNF $\alpha$  (30 ng/mL)/IFN $\gamma$  (30 U/mL) for 24 hours. Mean ( $\pm$ SD) of four independent experiments. \* $p$ <0.002 vs control; # $p$ <0.001 vs TWEAK alone; † $p$ <0.002 vs 0% FBS with stimuli. B) LNCaP cells, cultured without FBS, were stimulated with TWEAK alone or in combination with TNF $\alpha$ /IFN $\gamma$  for 24 hours. Mean ( $\pm$ SD) of three independent experiments. C) TWEAK, alone or in combination with TNF $\alpha$ /IFN $\gamma$ , induces apoptosis in PC-3 cells in a dose-dependent manner. Mean ( $\pm$ SD) of three independent experiments. \* $p$ <0.002 vs control; # $p$ <0.0001 vs control. D) Time-course of TWEAK-induced apoptosis in PC-3 cells, alone or in combination with TNF $\alpha$ /IFN $\gamma$ . Mean ( $\pm$ SD) of three independent experiments. \* $p$ <0.002 vs control; # $p$ <0.0001 vs control. doi:10.1371/journal.pone.0047440.g005

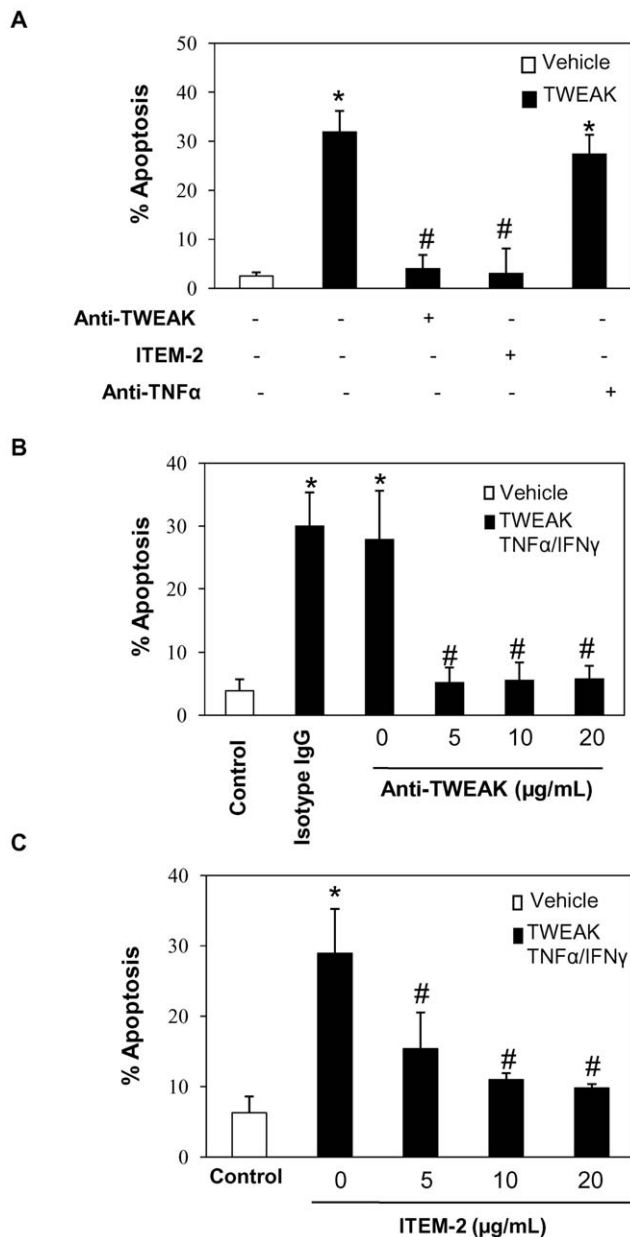

**Figure 6. TWEAK or Fn14 antagonism prevents apoptosis induced by TWEAK or TWEAK/TNF $\alpha$ /IFN $\gamma$  in PC-3 cells.** Cell death was assessed by flow cytometry of DNA content. **A)** PC-3 cells were pre-treated with anti-TWEAK neutralizing antibody (10  $\mu\text{g/ml}$ ), ITEM2 anti-Fn14 antibody (10  $\mu\text{g/ml}$ ), or anti-TNF $\alpha$  neutralizing antibody (10  $\mu\text{g/ml}$ ), added 1 hour before TWEAK. Cell death was assessed at 24 hours. Mean ( $\pm$ SD) of three independent experiments. \* $p$ <0.02 vs control; # $p$ <0.0001 vs TWEAK alone. **B), C)** PC-3 cells were pre-treated with anti-TWEAK neutralizing antibody (**B**) or with ITEM2 anti-Fn14 antibody (**C**), added 1 hour before TWEAK/TNF $\alpha$ /IFN $\gamma$ . Cell death was assessed at 24 hours. Mean ( $\pm$ SD) of three independent experiments. \* $p$ <0.02 vs control; # $p$ <0.0001 vs TWEAK/TNF $\alpha$ /IFN $\gamma$  alone. doi:10.1371/journal.pone.0047440.g006

induced apoptosis in PC-3 cells is TWEAK dose-dependent (**Figure 5.C**) and is observed from 18 hours (**Figure 5.D**).

#### Fn14 Mediates the Lethal Effect of TWEAK Over PC-3 Cells

While Fn14 is the only characterized TWEAK receptor, there is evidence for a second TWEAK receptor, and TWEAK can

bind to CD163 [45,46]. Therefore, we investigated whether TWEAK induces apoptosis in PC-3 cells through Fn14 activation. Pre-treatment with neutralizing anti-Fn14 (ITEM-2) or anti-TWEAK antibodies prevented TWEAK- (**Figure 6.A**) or TWEAK/TNF $\alpha$ /IFN $\gamma$ -induced apoptosis (**Figure 6.B-C**). These results suggest that TWEAK induces apoptosis in PC-3 cells through Fn14 activation. However, TWEAK may induce apoptosis through recruitment of endogenous TNF/TNF receptor 1 (TNFR1) [47]. To rule out this mechanism, we pre-stimulated PC-3 cells with an anti-TNF neutralizing antibody. Anti-TNF treatment did not prevent TWEAK-induced apoptosis in PC-3 cells (**Figure 6.A**).

#### Characterization of TWEAK-induced Apoptosis in PC-3 Cells

TWEAK-induced apoptosis in PC-3 cells was assessed both by the presence of hypodiploid cells measured by flow cytometry and by the typical morphology (nuclear shrinkage, condensation and fragmentation as well as decreased cell size) (**Figure 7.A-B**). In Annexin V/PI assays, TWEAK increased the percentage of apoptotic cells in PC-3 cells cultured in the absence of serum, and this was more evident in cells treated with TWEAK/TNF $\alpha$ /IFN $\gamma$ . However, neither TWEAK nor TWEAK/TNF $\alpha$ /IFN $\gamma$  increased the number of apoptotic cells in the presence of serum (**Figure 7.C**). In addition, TWEAK did not increase Annexin V/PI positive cells in the LNCaP cell line (data not shown). We then studied the levels of proteins of the Bcl2 family. TWEAK and TWEAK/TNF $\alpha$ /IFN $\gamma$  increased proapoptotic Bax levels (**Figure 8.A**), downregulated antiapoptotic BclxL levels (**Figure 8.B**), and increased the final Bax/BclxL ratio (**Figure 8.C**). These results indicate that TWEAK modulates proteins of the Bcl2 family to favor the apoptosis cell death. Moreover, a Bax inhibitor peptide (P5) dose-dependently decreased TWEAK-induced apoptosis in PC3 cells, further suggesting recruitment of Bax and the mitochondrial pathway (**Figure 8.D**). To confirm the involvement of the mitochondrial apoptosis pathway we performed immunofluorescence of cytochrome C (Cyt C). Unstimulated cells showed mitochondrial Cyt C staining, whereas, in presence of TWEAK/TNF $\alpha$ /IFN $\gamma$  some cells showed Cyt C release, indicating that this pathway is activated (**Figure 9**).

#### TWEAK-induced Apoptosis in PC-3 Cells is Caspase Dependent

Next, we studied the mechanisms of TWEAK-induced apoptosis in PC-3 cells. Pretreatment with a pan-caspase inhibitor, zVAD, prevented TWEAK/TNF $\alpha$ /IFN $\gamma$ -induced apoptosis in PC-3 cells, indicating that the apoptosis is caspases-dependent (**Figure 10.A**). Western blot showed processing of pro-caspase 3 to yield active caspase-3 in presence of TWEAK at 6 hours. This effect was stronger and earlier in presence of TWEAK/TNF $\alpha$ /IFN $\gamma$  (**Figure 10.B**). In presence of 10%FBS the TWEAK/TNF $\alpha$ /IFN $\gamma$  combination barely activated caspase 3 (**Figure 10.C**). Immunofluorescence using an anti-active caspase-3 antibody confirmed caspase-3 activation (**Figure 10.D**). In some cells stimulated with TNFSF cytokines, caspases inhibition prevents apoptotic cell death, but, induces necrotic cell death [33]. In cell death assays staining with PI, zVAD protected from the cell death induced by TWEAK/TNF $\alpha$ /IFN $\gamma$  at the same level that anti-TWEAK antibody. This result indicates that caspase inhibition does not induce necrosis in PC-3 cells stimulated with TWEAK (**Figure 11**).



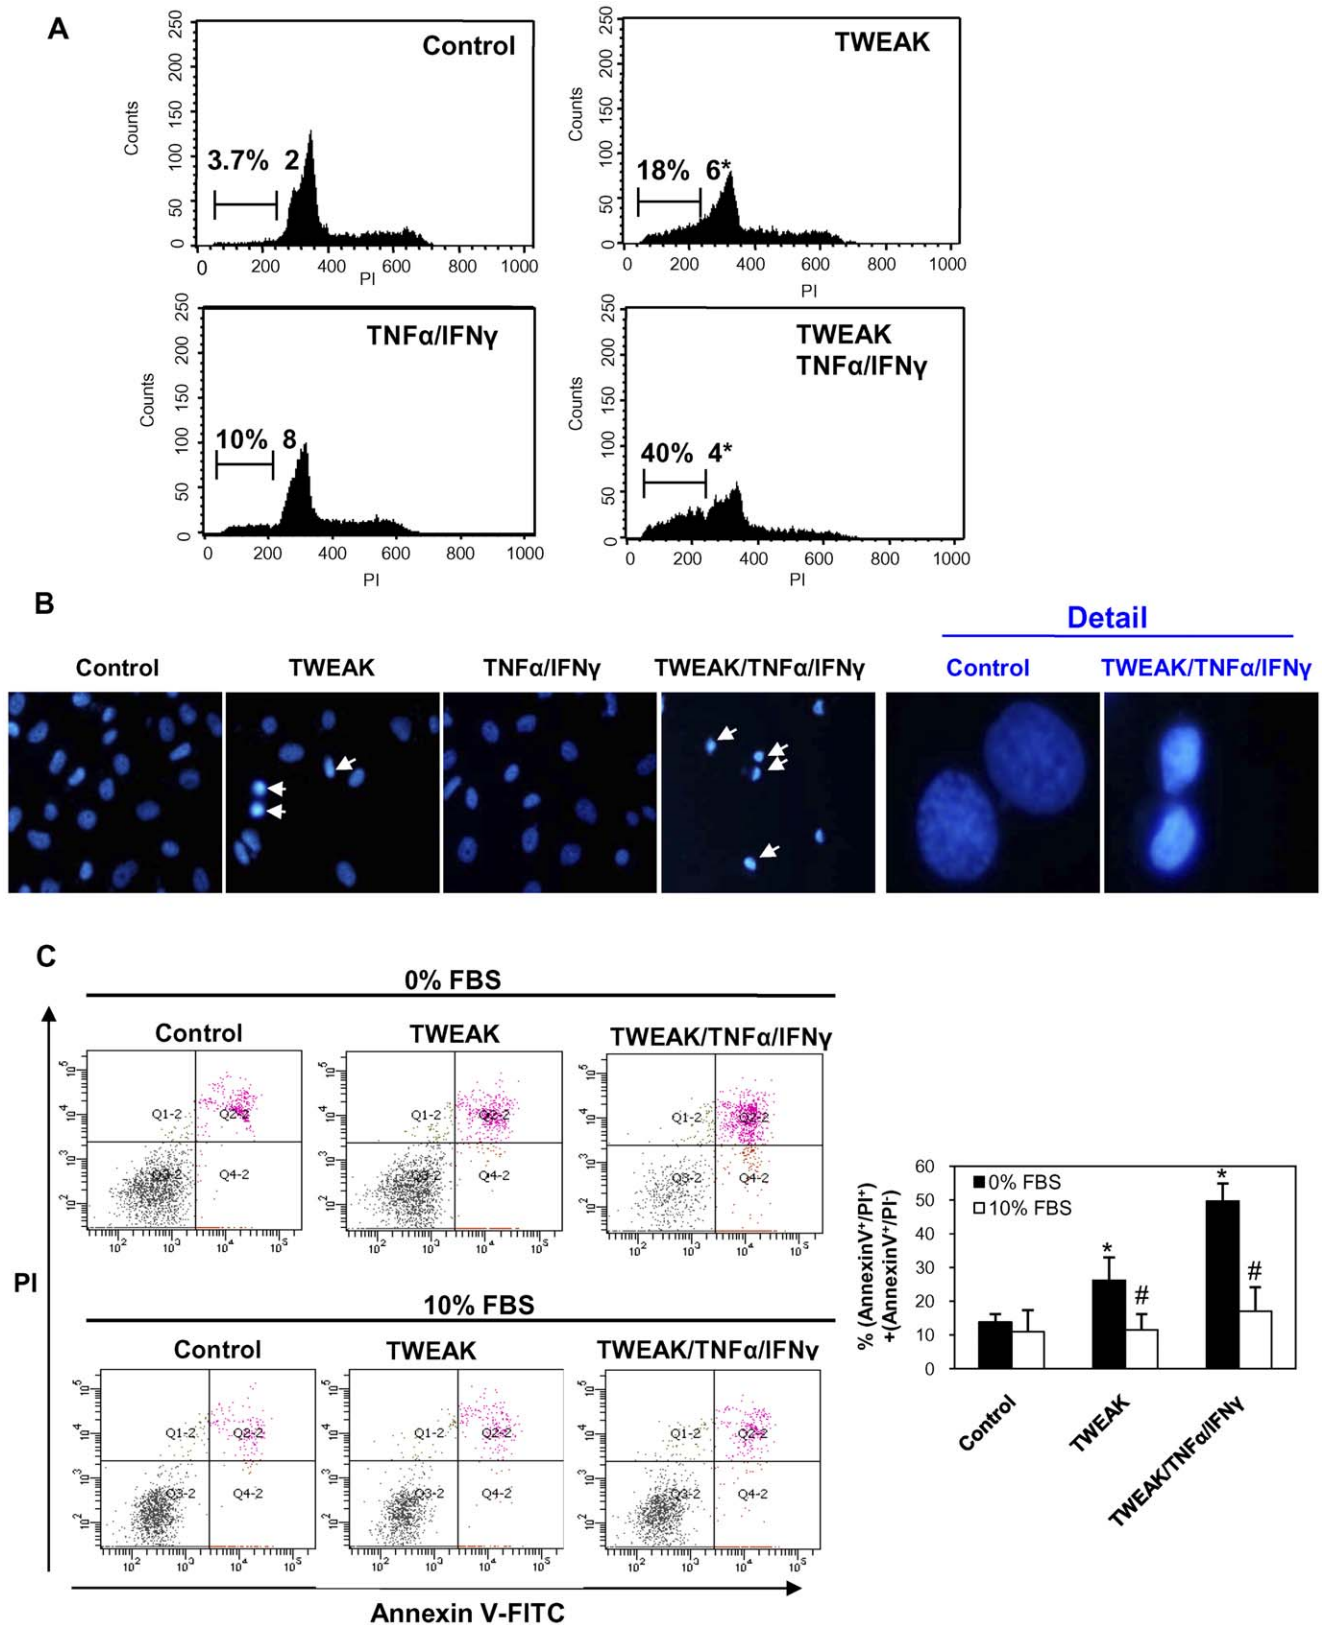

**Figure 7. TWEAK-induced PC-3 cell death has features of apoptosis. A)** Flow cytometry of DNA content. Note hypodiploid, apoptotic cells (—) among those treated with TWEAK, or with TWEAK/TNF $\alpha$ /IFN $\gamma$  for 24 hrs. Mean ( $\pm$ SD) of four experiments.\* $p$ <0.05 vs control. **B)** Characteristic shrunken, pyknotic, fragmented nuclei are present among DAPI-stained, TWEAK or TWEAK/TNF $\alpha$ /IFN $\gamma$ -treated cells (arrows), but are infrequent among control or TNF $\alpha$ /IFN $\gamma$ -treated cells. Magnification x400, detail x1000. **C)** PC-3 cells were cultured with or without serum and treated with TWEAK or TWEAK/TNF $\alpha$ /IFN $\gamma$  for 24 hours. Cells were staining with Annexin V/PI and analyzed by flow cytometry. TWEAK increases both early (Annexin V<sup>+</sup>/PI<sup>-</sup>)

and late (Annexin V<sup>+</sup>/PI<sup>+</sup>) apoptosis under serum deprivation conditions. Graphic shows percentage of early and late apoptosis [(AnnexinV<sup>+</sup>/PI<sup>-</sup>)+(AnnexinV<sup>+</sup>/PI<sup>+</sup>)]. Mean ( $\pm$ SD) of three independent experiments. \* $p$ <0.008 vs control; # $p$ <0.001 vs 0% FBS with stimuli. doi:10.1371/journal.pone.0047440.g007

## Discussion

The main finding is that cell culture conditions and, possibly the *in vivo* microenvironment can be manipulated to sensitize androgen-independent prostate cancer cells to TWEAK-induced apoptosis. Inflammatory cytokines and serum regulate both the expression of Fn14 in human cancer cell line PC-3, as well as the cell sensitivity to the lethal effect of TWEAK. Interestingly, the PC-3 androgen-independent cell line was sensitive to the lethal

effect of TWEAK when cultured in the absence of the survival and mitogenic factors contained in serum. Moreover, an inflammatory milieu composed of the combination of TNF $\alpha$ /IFN $\gamma$  increased the lethal effect of TWEAK over these cells. This offers new potential therapeutic opportunities for androgen-independent prostate cancer.

We studied the TWEAK/Fn14 system in androgen-sensitive LNCaP cells and in androgen-independent PC3 cells. Confirming previous reports [35] we observed a higher expression of Fn14 in

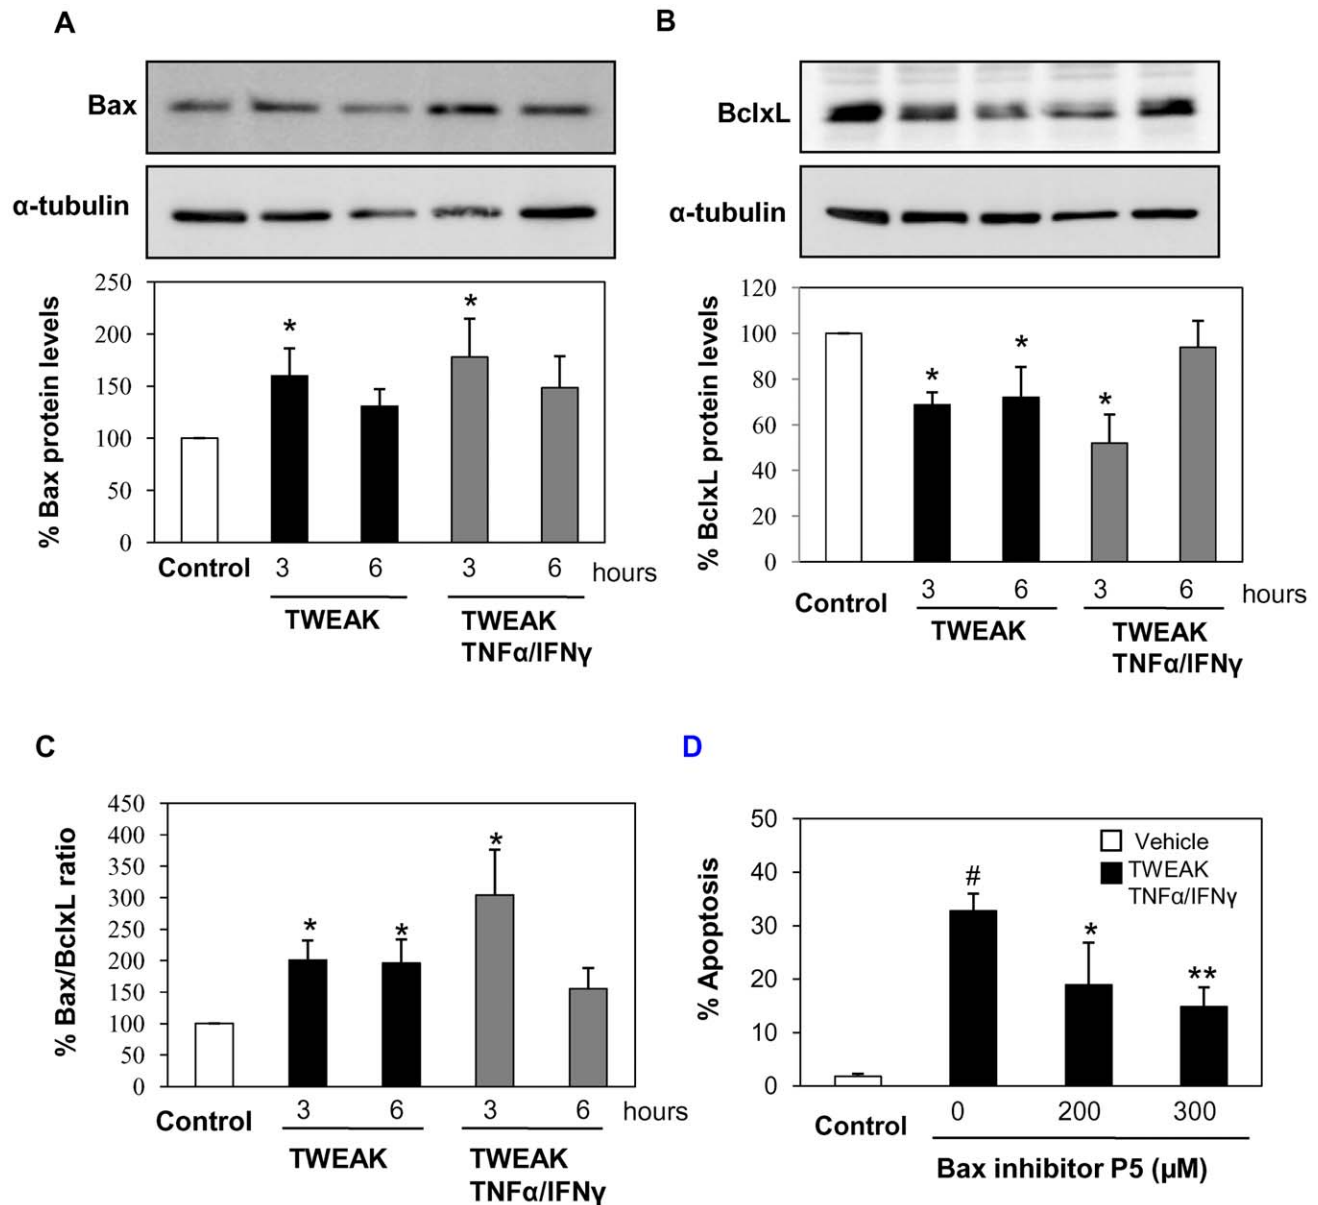

**Figure 8. TWEAK modulates Bax and BclxL protein levels in PC-3 cells.** **A), B)** PC-3 cells were stimulated with TWEAK or TWEAK/TNF $\alpha$ /IFN $\gamma$ , and Bax (**A**) and (**B**) BclxL protein levels were analyzed by western blot. Mean ( $\pm$ SEM) of three experiments. \* $p$ <0.05 vs control. **C)** Ratio of Bax/BclxL protein levels in PC-3 cells. Mean ( $\pm$ SEM) of three independent experiments. \* $p$ <0.05 vs control. **D)** PC-3 cells were treated with Bax inhibitor peptide P5 at indicated doses one hour before to add TWEAK/TNF $\alpha$ /IFN $\gamma$ . Cell death was measured by flow cytometry of DNA content. Mean ( $\pm$ SD) of three independent experiments. # $p$ <0.002 vs Control; \* $p$ <0.05 vs TWEAK/TNF $\alpha$ /IFN $\gamma$ ; \*\* $p$ <0.005 vs TWEAK/TNF $\alpha$ /IFN $\gamma$ . doi:10.1371/journal.pone.0047440.g008

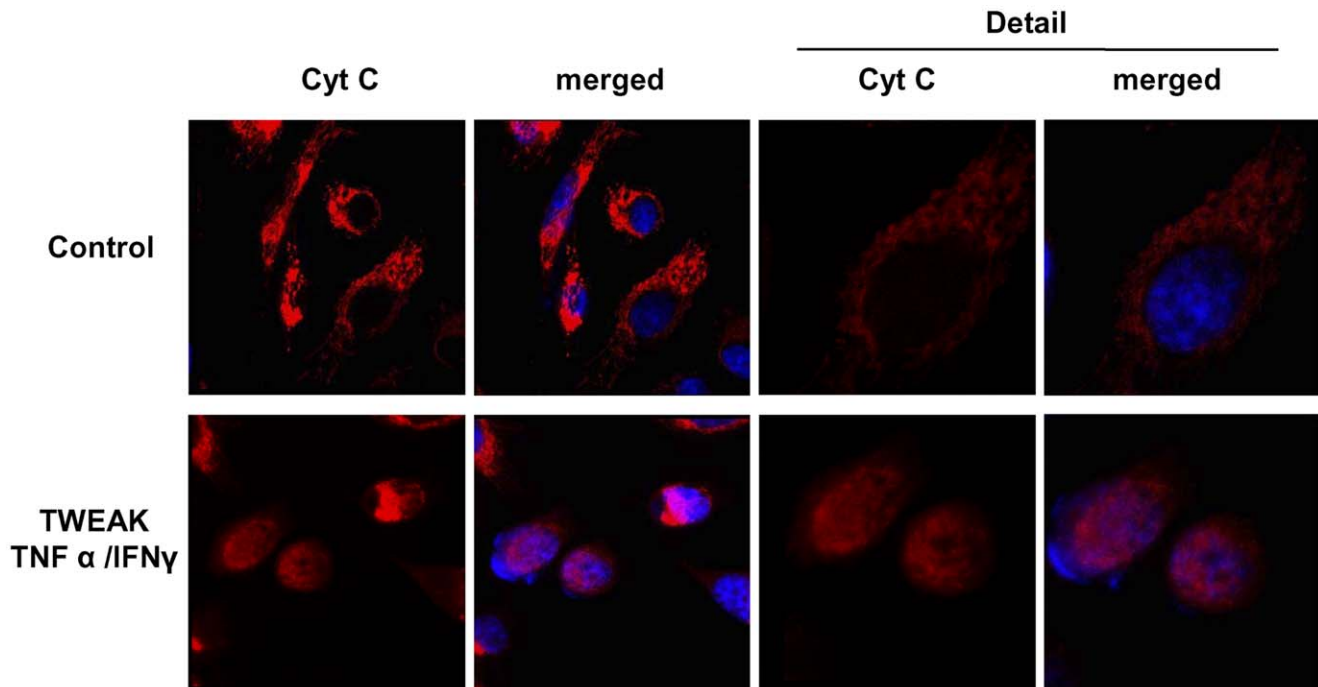

**Figure 9. TWEAK induces cytochrome C release from the mitochondria in PC-3 cells.** PC-3 cells treated with for 24 hours showed mitochondrial cytochrome C release. Confocal microscopy. Cytochrome C in red and DAPI in blue. (Magnification x400, detail x1000). Pictures representatives of three experiments.  
doi:10.1371/journal.pone.0047440.g009

PC-3 cells than in LNCaP cells. LNCaP cells expressed non-inducible, low levels of Fn14. Both LNCaP and PC-3 cells respond to the pro-inflammatory effect of TWEAK. However, the apoptotic response of both prostate cancer cell lines to TWEAK differed. LNCaP cells were resistant to TWEAK-induced apoptosis, both in the presence or absence of TNF $\alpha$ /IFN $\gamma$ . More interesting were the results obtained in androgen-independent PC-3 cells, since androgen independent prostate cancer poses a more significant therapeutic challenge. Serum-deprived PC-3 cells were spontaneously sensitive to TWEAK-induced apoptosis and this effect was increased in an inflammatory milieu. Huang et al [35] reported that Fn14 increased proliferation and prevented basal apoptosis in PC-3 cells. However, these results were obtained in PC-3 cells cultured in the presence of FBS, and we observed the lethal effect of TWEAK over PC-3 cells cultured in the absence of serum. This phenomenon has already been observed for non-prostate cells. Thus, TWEAK alone induced proliferation, not cell death, in cultured, non-tumor, non-stressed renal tubular epithelial cells [34]. Upregulation of the Fn14 receptor by the growth factors present in serum increased the sensitivity of tubular cells to TWEAK-induced proliferation [34]. By contrast, upregulation of Fn14 expression in serum-deprived tubular cells by inflammatory cytokines (TNF $\alpha$ /IFN $\gamma$ ) changed the response to TWEAK from proliferation to cell death [33,34].

An inflammatory milieu resulted in a sustained increase in the expression of Fn14 in PC-3 cells. However, similar to observation in tubular cells [34], the level of Fn14 expression may not be the single mechanism implicated in TWEAK sensitization, as serum also increased Fn14 expression but did not sensitize to cell death by TWEAK in PC-3 cells. A similar pattern of sensitivity to another TNFSF cytokine has been described: PC-3 were reported to be highly sensitive to TRAIL-induced apoptosis, and LNCaP to be resistant [48]. Although not confirmed by all authors [49] this

observation may have a biological basis: androgens positively regulate the expression of the antiapoptotic FADD-like interleukin-1 $\beta$ -converting enzyme (FLICE)-like inhibitory protein (FLIP) [50], which blocks transmission of the lethal signal from TNFSF receptors that possess a death domain (DD) [51]. This information is pertinent despite Fn14 lacking a DD because one of the potential pathways for TWEAK-induced apoptosis is sensitization to minor amounts of other TNFSF cytokines present in the microenvironment [52].

We also characterized the molecular and cellular mechanism of the cell death induced by TWEAK in PC-3 cells. PC-3 treated with TWEAK showed characteristics of apoptosis, such as presence of hypodiploid cells, the typical morphology (nuclear shrinkage, condensation and fragmentation as well as decreased cell size) and Annexin V/PI staining. Furthermore, we observed that TWEAK modulated proteins of Bcl2 family, increasing the Bax/BclxL ratio, and a Bax inhibitor peptide dose-dependently prevented cell death. TWEAK-induced apoptosis in PC-3 cells was caspase-dependent. Different to other cell systems caspase inhibition did not sensitize PC-3 cells to necrotic death [33].

Natural sources of TWEAK in the prostate may include leukocytes. Thus, T cells express an array of lethal cytokines, such as TRAIL and TWEAK that are functional in target cell killing [53,54]. Furthermore, TWEAK mediates the anti-tumor effect of tumor-infiltrating macrophages [55]. Since these are inflammatory cells, this information, together with our observation, suggests that TWEAK may have a role in natural defenses against prostate cancer. In addition, TWEAK circulates in serum [56]. However, circulating TWEAK levels may decrease under diverse pathological circumstances, including chronic kidney disease, vascular injury and diabetes [57–59]. Interestingly, diabetes appears to worsen the outcomes of prostate cancer [60,61]. It would be worth measuring circulating TWEAK levels in metastatic prostate

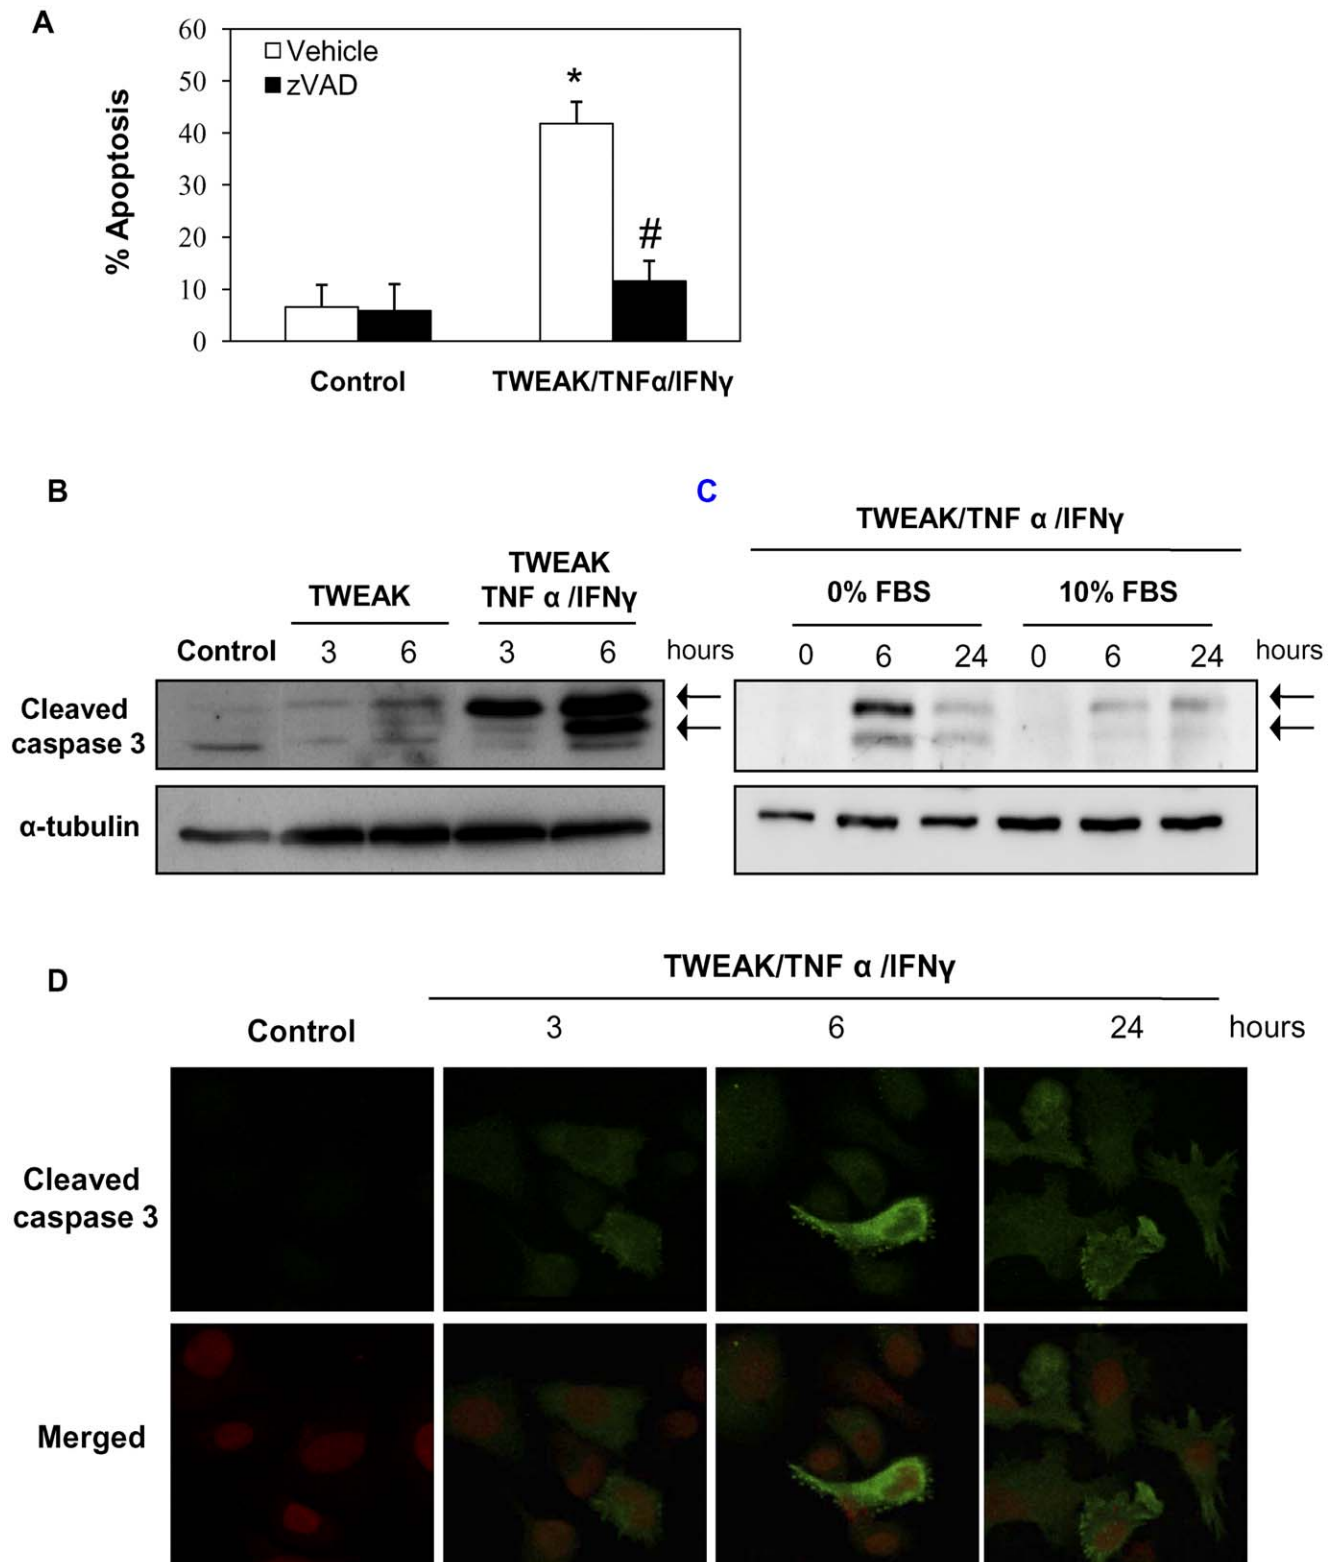

**Figure 10. TWEAK-induced apoptosis in PC-3 cells is dependent on caspase activation.** **A)** Inhibition of caspases with pan-caspase inhibitor zVAD (20  $\mu$ M) prevented apoptosis in PC-3 cells stimulated with TWEAK/TNF $\alpha$ /IFN $\gamma$  for 24 hours. Apoptosis was assessed by flow cytometry of DNA content. Mean ( $\pm$ SD) of three experiments. \* $p$ <0.002 vs control; # $p$ <0.001 vs TWEAK/TNF $\alpha$ /IFN $\gamma$  alone. **B)** Incubation with TWEAK or TWEAK/TNF $\alpha$ /IFN $\gamma$  resulted in the appearance of active caspase-3 fragments (arrows, representative Western blot), **C)** and this is barely observed in presence of 10% FBS. **D)** Active caspase 3 immunofluorescence in PC-3 cells treated with TWEAK/TNF $\alpha$ /IFN $\gamma$ . Confocal microscopy. Active caspase 3 in green and propidium iodide in red. (Magnification 320 $\times$ ). Pictures representative of three independent experiments. doi:10.1371/journal.pone.0047440.g010

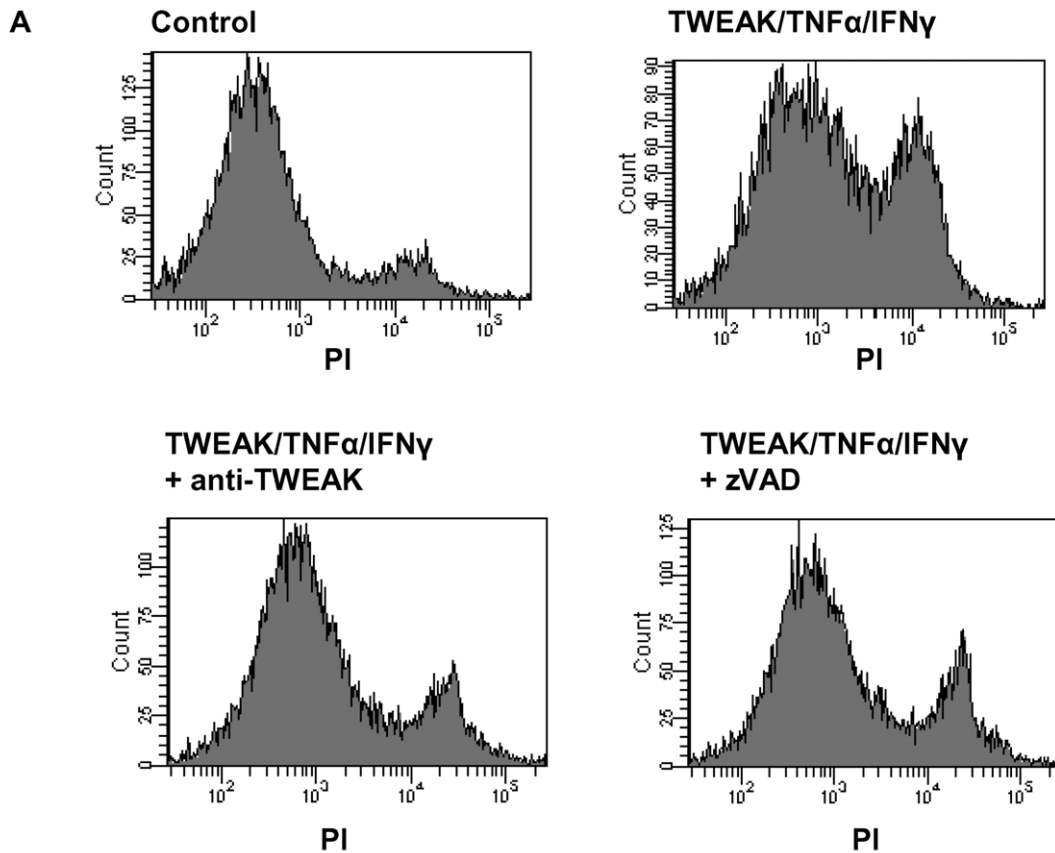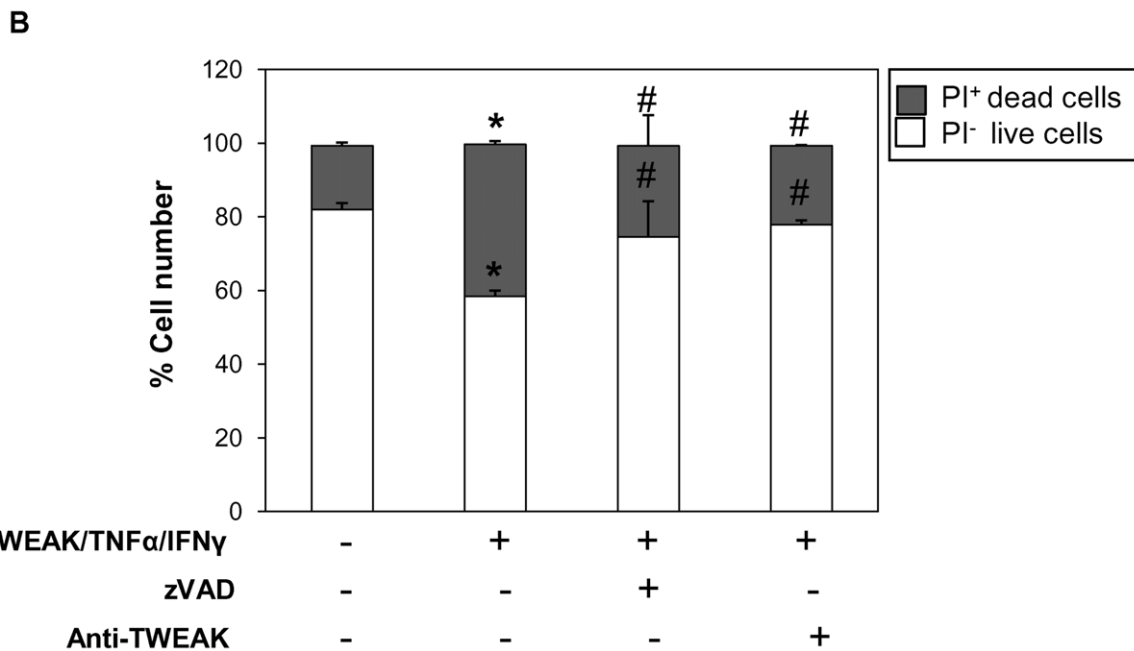

**Figure 11. Inhibition of caspases did not induce necrotic cell death in PC-3 cells.** Cell death was assessed by flow cytometry of PI staining. PC-3 cells treated with TWEAK/TNFα/IFNγ for 24 hours showed high levels of cell death, and this was significantly reduced with anti-TWEAK neutralizing antibody or with pan-caspase inhibitor zVAD. PI stains late apoptotic and necrotic cells. Mean (±SD) of three independent experiments. \*p<0.005 vs control; #p<0.02 vs TWEAK/TNFα/IFNγ alone. doi:10.1371/journal.pone.0047440.g011

carcinoma, since low TWEAK availability might be one of the factors facilitating tumor expansion once it reaches an androgen-resistant stage. In addition, CD163, a scavenger TWEAK receptor

expressed by certain macrophages [45] and may compromise TWEAK availability in the context of an inflamed prostate. In this regard, a biological therapy approach destined to activate the

Fn14 receptor in androgen resistant prostate cancer may complement natural anti-tumor defenses. The use of an activating antibody may bypass regulatory or maladaptive mechanisms that lower TWEAK levels.

The recent availability of Fn14 targeting antibodies may enhance the spectrum of prostate tumors sensitive to TWEAK/Fn14 modulating therapies. Two different anti-Fn14 antibodies have shown anti-tumor activity in cultured cells and experimental models [26] [62,63]. A phase 1 dose escalation trial of PDL192 humanized anti-TWEAK receptor monoclonal antibody in subjects with advanced solid tumors was recently completed [30]. An agonistic anti-Fn14 antibody undergoing clinical trials appears to have dual mechanisms of action, where binding to the target activates Fn14 and also recruits the immune system to mediate antibody-dependent cellular cytotoxicity (ADCC) activity to help destroy the tumor [26]. Recruitment of ADCC may sensitize to killing by this antibody even Fn14-expressing, TWEAK-resistant cells.

In conclusion, TWEAK activation of the Fn14 receptor induced apoptosis in androgen-independent prostate cancer cells, when

stimulated with inflammatory cytokines and deprived of survival factors. Since that TWEAK/Fn14 system was previously reported to promote prostate cancer cell proliferation in the presence of serum, this information may have therapeutic consequences for treatment of androgen-independent prostate cancer by designing maneuvers that sensitize tumor cells to TWEAK-induced apoptosis or by the use of agonistic anti-Fn14 antibodies [26].

## Acknowledgments

Gonzalo Rodriguez Berriguete and Mar Royuela helped with prostate cell cultures.

## Author Contributions

Conceived and designed the experiments: ABS MDSN. Performed the experiments: ABS MDSN SC ORA. Analyzed the data: ABS AO MRO JE. Contributed reagents/materials/analysis tools: RS CGE FM. Wrote the paper: ABS AO.

## References

- Jemal A, Siegel R, Xu J, Ward E (2010) Cancer statistics, 2010. *CA Cancer J Clin* 60: 277–300. caac.20073 [pii];10.3322/caac.20073 [doi].
- Hwang C, Heath EI (2010) Angiogenesis inhibitors in the treatment of prostate cancer. *J Hematol Oncol* 3: 26. 1756-8722-3-26 [pii];10.1186/1756-8722-3-26 [doi].
- Williamson BD, Carswell EA, Rubin BY, Prendergast JS, Old LJ (1983) Human tumor necrosis factor produced by human B-cell lines: synergistic cytotoxic interaction with human interferon. *Proc Natl Acad Sci U S A* 80: 5397–5401.
- Carswell EA, Old LJ, Kassel RL, Green S, Fiore N, et al. (1975) An endotoxin-induced serum factor that causes necrosis of tumors. *Proc Natl Acad Sci U S A* 72: 3666–3670.
- Aggarwal BB, Kohr WJ, Hass PE, Moffat B, Spencer SA, et al. (1985) Human tumor necrosis factor. Production, purification, and characterization. *J Biol Chem* 260: 2345–2354.
- Pennica D, Nedwin GE, Hayflick JS, Seeburg PH, Derynck R, et al. (1984) Human tumour necrosis factor: precursor structure, expression and homology to lymphotoxin. *Nature* 312: 724–729.
- Royuela M, Rodriguez-Berriguete G, Fraile B, Paniagua R (2008) TNF-alpha/IL-1/NF-kappaB transduction pathway in human cancer prostate. *Histol Histopathol* 23: 1279–1290.
- Nastiuk KL, Krolewski JJ (2008) FLIP-ping out: death receptor signaling in the prostate. *Cancer Biol Ther* 7: 1171–1179. 6712 [pii].
- Guseva NV, Taghiyev AF, Rokhlin OW, Cohen MB (2004) Death receptor-induced cell death in prostate cancer. *J Cell Biochem* 91: 70–99. 10.1002/jcb.10707 [doi].
- Tenniswood M, Lee EC (2004) On the trail of cell death pathways in prostate cancer. *Cancer Biol Ther* 3: 769–771. 1028 [pii].
- Bucur O, Ray S, Bucur MC, Almasan A (2006) APO2 ligand/tumor necrosis factor-related apoptosis-inducing ligand in prostate cancer therapy. *Front Biosci* 11: 1549–1568. 1903 [pii].
- Perez-Martinez FC, Alonso V, Sarasa JL, Nam-Cha SG, Vela-Navarrete R, et al. (2007) Immunohistochemical analysis of low-grade and high-grade prostate carcinoma: relative changes of parathyroid hormone-related protein and its parathyroid hormone 1 receptor, osteoprotegerin and receptor activator of nuclear factor-kB ligand. *J Clin Pathol* 60: 290–294. jcp.2006.037853 [pii];10.1136/jcp.2006.037853 [doi].
- O’Kane HF, Watson CJ, Johnston SR, Petak I, Watson RW, et al. (2006) Targeting death receptors in bladder, prostate and renal cancer. *J Urol* 175: 432–438. S0022-5347(05)00160-6 [pii];10.1016/S0022-5347(05)00160-6 [doi].
- Chicheportiche Y, Bourdon PR, Xu H, Hsu YM, Scott H, et al. (1997) TWEAK, a new secreted ligand in the tumor necrosis factor family that weakly induces apoptosis. *J Biol Chem* 272: 32401–32410.
- Sanz AB, Sanchez-Nino MD, Ortiz A (2011) TWEAK, a multifunctional cytokine in kidney injury. *Kidney Int* 80: 708–718. ki2011180 [pii];10.1038/ki.2011.180 [doi].
- Jakubowski A, Ambrose C, Parr M, Linccum JM, Wang MZ, et al. (2005) TWEAK induces liver progenitor cell proliferation. *J Clin Invest* 115: 2330–2340.
- Lynch CN, Wang YC, Lund JK, Chen YW, Leal JA, et al. (1999) TWEAK induces angiogenesis and proliferation of endothelial cells. *J Biol Chem* 274: 8455–8459.
- Maecker H, Varfolomeev E, Kischkel F, Lawrence D, LeBlanc H, et al. (2005) TWEAK attenuates the transition from innate to adaptive immunity. *Cell* 123: 931–944.
- Nakayama M, Harada N, Okumura K, Yagita H (2003) Characterization of murine TWEAK and its receptor (Fn14) by monoclonal antibodies. *Biochem Biophys Res Commun* 306: 819–825.
- Tran NL, McDonough WS, Savitch BA, Sawyer TF, Winkles JA, et al. (2005) The tumor necrosis factor-like weak inducer of apoptosis (TWEAK)-fibroblast growth factor-inducible 14 (Fn14) signaling system regulates glioma cell survival via NF-kappaB pathway activation and BCL-XL/BCL-W expression. *J Biol Chem* 280: 3483–3492.
- Mittal A, Bhatnagar S, Kumar A, Lach-Trifilieff E, Wauters S, et al. (2010) The TWEAK-Fn14 system is a critical regulator of denervation-induced skeletal muscle atrophy in mice. *J Cell Biol* 188: 833–849. jcb.200909117 [pii];10.1083/jcb.200909117 [doi].
- Wang D, Fung JN, Tuo Y, Hu L, Chen C (2010) TWEAK/Fn14 promotes apoptosis of human endometrial cancer cells via caspase pathway. *Cancer Lett* 294: 91–100. S0304-3835(10)00053-4 [pii];10.1016/j.canlet.2010.01.027 [doi].
- Novoyatleva T, Diehl F, van Amerongen MJ, Patra C, Ferrazzi F, et al. (2010) TWEAK is a positive regulator of cardiomyocyte proliferation. *Cardiovasc Res* 85: 681–690. cvp360 [pii];10.1093/cvr/cvp360 [doi].
- Tiller G, Fischer-Posovszky P, Laumen H, Finck A, Skurk T, et al. (2009) Effects of TWEAK (TNF superfamily member 12) on differentiation, metabolism, and secretory function of human primary preadipocytes and adipocytes. *Endocrinology* 150: 5373–5383. en.2009-0488 [pii];10.1210/en.2009-0488 [doi].
- Dionne S, Levy E, Levesque D, Seidman EG (2010) PPARgamma ligand 15-deoxy-delta 12,14-prostaglandin J2 sensitizes human colon carcinoma cells to TWEAK-induced apoptosis. *Anticancer Res* 30: 157–166. 30/1/157 [pii].
- Culp PA, Choi D, Zhang Y, Yin J, Seto P, et al. (2010) Antibodies to TWEAK receptor inhibit human tumor growth through dual mechanisms. *Clin Cancer Res* 16: 497–508. 1078-0432.CCR-09-1929 [pii];10.1158/1078-0432.CCR-09-1929 [doi].
- Michaelson JS, Burkly LC (2009) Therapeutic targeting of TWEAK/Fn14 in cancer: exploiting the intrinsic tumor cell killing capacity of the pathway. *Results Probl Cell Differ* 49: 145–160. 10.1007/400\_2008\_18 [doi].
- Watts GS, Tran NL, Berens ME, Bhattacharyya AK, Nelson MA, et al. (2007) Identification of Fn14/TWEAK receptor as a potential therapeutic target in esophageal adenocarcinoma. *Int J Cancer* 121: 2132–2139. 10.1002/ijc.22898 [doi].
- Winkles JA (2008) The TWEAK-Fn14 cytokine-receptor axis: discovery, biology and therapeutic targeting. *Nat Rev Drug Discov* 7: 411–425. nrd2488 [pii];10.1038/nrd2488 [doi].
- Available: <http://clinicaltrials.gov/ct2/show/NCT00738764>. Accessed 2012 August 6.
- Dai L, Gu L, Ding C, Qiu L, Di W (2009) TWEAK promotes ovarian cancer cell metastasis via NF-kappaB pathway activation and VEGF expression. *Cancer Lett* 283: 159–167. S0304-3835(09)00228-6 [pii];10.1016/j.canlet.2009.03.036 [doi].
- Willis AL, Tran NL, Chatigny JM, Charlton N, Vu H, et al. (2008) The fibroblast growth factor-inducible 14 receptor is highly expressed in HER2-positive breast tumors and regulates breast cancer cell invasive capacity. *Mol Cancer Res* 6: 725–734. 6/5/725 [pii];10.1158/1541-7786.MCR-08-0005 [doi].
- Justo P, Sanz AB, Sanchez-Nino MD, Winkles JA, Lorz C, et al. (2006) Cytokine cooperation in renal tubular cell injury: the role of TWEAK. *Kidney Int* 70: 1750–1758.



34. Sanz AB, Sanchez-Nino MD, Izquierdo MC, Jakubowski A, Justo P, et al. (2009) Tweak induces proliferation in renal tubular epithelium: a role in uninephrectomy induced renal hyperplasia. *J Cell Mol Med* 13: 3329–3342. JCOMM766 [pii];10.1111/j.1582-4934.2009.00766.x [doi].
35. Huang M, Narita S, Tsuchiya N, Ma Z, Numakura K, et al. (2011) Overexpression of Fn14 promotes androgen-independent prostate cancer progression through MMP-9 and correlates with poor treatment outcome. *Carcinogenesis* 32: 1589–1596. bgr182 [pii];10.1093/carcin/bgr182 [doi].
36. Alonso V, Perez-Martinez FC, Calahorra FJ, Esbrit P (2009) Phytoestrogen modulation of bone-related cytokines and its impact on cell viability in human prostate cancer cells. *Life Sci* 85: 421–430. S0024-3205(09)00303-8 [pii];10.1016/j.lfs.2009.07.005 [doi].
37. Rodriguez-Berriguete G, Fraile B, Paniagua R, Aller P, Royuela M (2012) Expression of NF-kappaB-related proteins and their modulation during TNF-alpha-provoked apoptosis in prostate cancer cells. *Prostate* 72: 40–50. 10.1002/pros.21404 [doi].
38. Sanchez-Nino MD, Sanz AB, Lorz C, Gnirke A, Rastaldi MP, Nair V, et al. (2010) BASP1 promotes apoptosis in diabetic nephropathy. *J Am Soc Nephrol* 21: 610–621. ASN.2009020227 [pii];10.1681/ASN.2009020227 [doi].
39. Molano A, Lakhani P, Aran A, Burkly LC, Michaelson JS, et al. (2009) TWEAK stimulation of kidney resident cells in the pathogenesis of graft versus host induced lupus nephritis. *Immunol Lett* 125: 119–128. S0165-2478(09)00164-3 [pii];10.1016/j.imlet.2009.06.010 [doi].
40. Sanz AB, Justo P, Sanchez-Nino MD, Blanco-Colio LM, Winkles JA, et al. (2008) The cytokine TWEAK modulates renal tubulointerstitial inflammation. *J Am Soc Nephrol* 19: 695–703. ASN.2007050577 [pii];10.1681/ASN.2007050577 [doi].
41. Ortiz A, Lorz C, Catalan MP, Danoff TM, Yamasaki Y, et al. (2000) Expression of apoptosis regulatory proteins in tubular epithelium stressed in culture or following acute renal failure. *Kidney Int* 57: 969–981.
42. Lorz C, Ortiz A, Justo P, Gonzalez-Cuadrado S, Duque N, et al. (2000) Proapoptotic Fas ligand is expressed by normal kidney tubular epithelium and injured glomeruli. *J Am Soc Nephrol* 11: 1266–1277.
43. Munoz-Garcia B, Martin-Ventura JL, Martinez E, Sanchez S, Hernandez G, et al. (2006) Fn14 is upregulated in cytokine-stimulated vascular smooth muscle cells and is expressed in human carotid atherosclerotic plaques: modulation by atorvastatin. *Stroke* 37: 2044–2053.
44. Xia LP, Fang F, Lu J, Xiao WG (2010) [The expression of TWEAKR/Fn14 in Rheumatoid arthritis fibroblast-like synoviocytes]. *Xi Bao Yu Fen Zi Mian Yi Xue Za Zhi* 26: 575–577.
45. Moreno JA, Munoz-Garcia B, Martin-Ventura JL, Madrigal-Matute J, Orbe J, et al. (2009) The CD163-expressing macrophages recognize and internalize TWEAK: potential consequences in atherosclerosis. *Atherosclerosis* 207: 103–110. S0021-9150(09)00334-7 [pii];10.1016/j.atherosclerosis.2009.04.033 [doi].
46. Bover LC, Cardo-Vila M, Kuniyasu A, Sun J, Rangel R, et al. (2007) A previously unrecognized protein-protein interaction between TWEAK and CD163: potential biological implications. *J Immunol* 178: 8183–8194.
47. Schneider P, Schwenzler R, Haas E, Muhlenbeck F, Schubert G, et al. (1999) AID-IMMU1785>3.0.CO;2-U [pii];10.1002/(SICI)1521-4141(199906)29:06<#60;1785::AID-IMMU1785#62;3.0.CO;2-U [doi].
48. Nesterov A, Lu X, Johnson M, Miller GJ, Ivashchenko Y, et al. (2001) Elevated AKT activity protects the prostate cancer cell line LNCaP from TRAIL-induced apoptosis. *J Biol Chem* 276: 10767–10774. 10.1074/jbc.M005196200 [doi];M005196200 [pii].
49. Festuccia C, Gravina GL, D'Alessandro AM, Millimaggi D, Di RC, et al. (2008) Downmodulation of dimethyl transferase activity enhances tumor necrosis factor-related apoptosis-inducing ligand-induced apoptosis in prostate cancer cells. *Int J Oncol* 33: 381–388.
50. Cornforth AN, Davis JS, Khanifar E, Nastiuk KL, Krolewski JJ (2008) FOXO3a mediates the androgen-dependent regulation of FLIP and contributes to TRAIL-induced apoptosis of LNCaP cells. *Oncogene* 27: 4422–4433. onc200880 [pii];10.1038/onc.2008.80 [doi].
51. Shirley S, Micheau O (2010) Targeting c-FLIP in cancer. *Cancer Lett*. S0304-3835(10)00485-4 [pii];10.1016/j.canlet.2010.10.009 [doi].
52. Vince JE, Chau D, Callus B, Wong WW, Hawkins CJ, et al. (2008) TWEAK-FN14 signaling induces lysosomal degradation of a cIAP1-TRAF2 complex to sensitize tumor cells to TNFalpha. *J Cell Biol* 182: 171–184. jcb.200801010 [pii];10.1083/jcb.200801010 [doi].
53. Kaplan MJ, Ray D, Mo RR, Yung RL, Richardson BC (2000) TRAIL (Apo2 ligand) and TWEAK (Apo3 ligand) mediate CD4+ T cell killing of antigen-presenting macrophages. *J Immunol* 164: 2897–2904. ji.v164n6p2897 [pii].
54. Kaplan MJ, Lewis EE, Shelden EA, Somers E, Pavlic R, et al. (2002) The apoptotic ligands TRAIL, TWEAK, and Fas ligand mediate monocyte death induced by autologous lupus T cells. *J Immunol* 169: 6020–6029.
55. Kaduka Y, Takeda K, Nakayama M, Kinoshita K, Yagita H, et al. (2005) TWEAK mediates anti-tumor effect of tumor-infiltrating macrophage. *Biochem Biophys Res Commun* 331: 384–390. S0006-291X(05)00669-8 [pii];10.1016/j.bbrc.2005.03.176 [doi].
56. Blanco-Colio LM, Martin-Ventura JL, Munoz-Garcia B, Orbe J, Paramo JA, et al. (2007) Identification of soluble tumor necrosis factor-like weak inducer of apoptosis (sTWEAK) as a possible biomarker of subclinical atherosclerosis. *Arterioscler Thromb Vasc Biol* 27: 916–922. 01.ATV.0000258972.10109.ff [pii];10.1161/01.ATV.0000258972.10109.ff [doi].
57. Martin-Ventura JL, Lindholt JS, Moreno JA, Vega de CM, Meilhac O, et al. (2010) Soluble TWEAK plasma levels predict expansion of human abdominal aortic aneurysms. *Atherosclerosis*. S0021-9150(10)00908-1 [pii];10.1016/j.atherosclerosis.2010.11.009 [doi].
58. Carrero JJ, Ortiz A, Qureshi AR, Martin-Ventura JL, Barany P, et al. (2009) Additive effects of soluble TWEAK and inflammation on mortality in hemodialysis patients. *Clin J Am Soc Nephrol* 4: 110–118. CJN.02790608 [pii];10.2215/CJN.02790608 [doi].
59. Kralisch S, Ziegelmeier M, Bachmann A, Seeger J, Lossner U, et al. (2008) Serum levels of the atherosclerosis biomarker sTWEAK are decreased in type 2 diabetes and end-stage renal disease. *Atherosclerosis* 199: 440–444. S0021-9150(07)00679-X [pii];10.1016/j.atherosclerosis.2007.10.022 [doi].
60. Kim HS, Presti JC, Jr., Aronson WJ, Terris MK, Kane CJ, et al. (2010) Glycemic control and prostate cancer progression: results from the SEARCH database. *Prostate* 70: 1540–1546. 10.1002/pros.21189 [doi].
61. Snyder CF, Stein KB, Barone BB, Peairs KS, Yeh HC, et al. (2010) Does pre-existing diabetes affect prostate cancer prognosis? A systematic review. *Prostate Cancer Prostatic Dis* 13: 58–64. pcan200939 [pii];10.1038/pcan.2009.39 [doi].
62. Michaelson JS, Amatucci A, Kelly R, Su L, Garber E, et al. (2011) Development of an Fn14 agonistic antibody as an anti-tumor agent. *MABS* 3: 362–375. 16090 [pii].
63. Michaelson JS, Kelly R, Yang L, Zhang X, Wortham K, et al. (2012) The anti-Fn14 antibody B1B036 inhibits tumor growth in xenografts and patient derived primary tumor models and enhances efficacy of chemotherapeutic agents in multiple xenograft models. *Cancer Biol Ther* 13: 20564 [pii].
